# Supplementary material for: Pre-pregnancy Body Mass Index and Adverse Pregnancy Outcomes: A Cross-Sectional Analysis Followed by Mendelian Randomization Study
Source: Research Square preprint supplement (doi:10.21203/rs.3.rs-8723004/v1), 2026-02-11
Supplement: Supplementary file 1 [file 2810e8521aa89851bed4e9a5.docx]

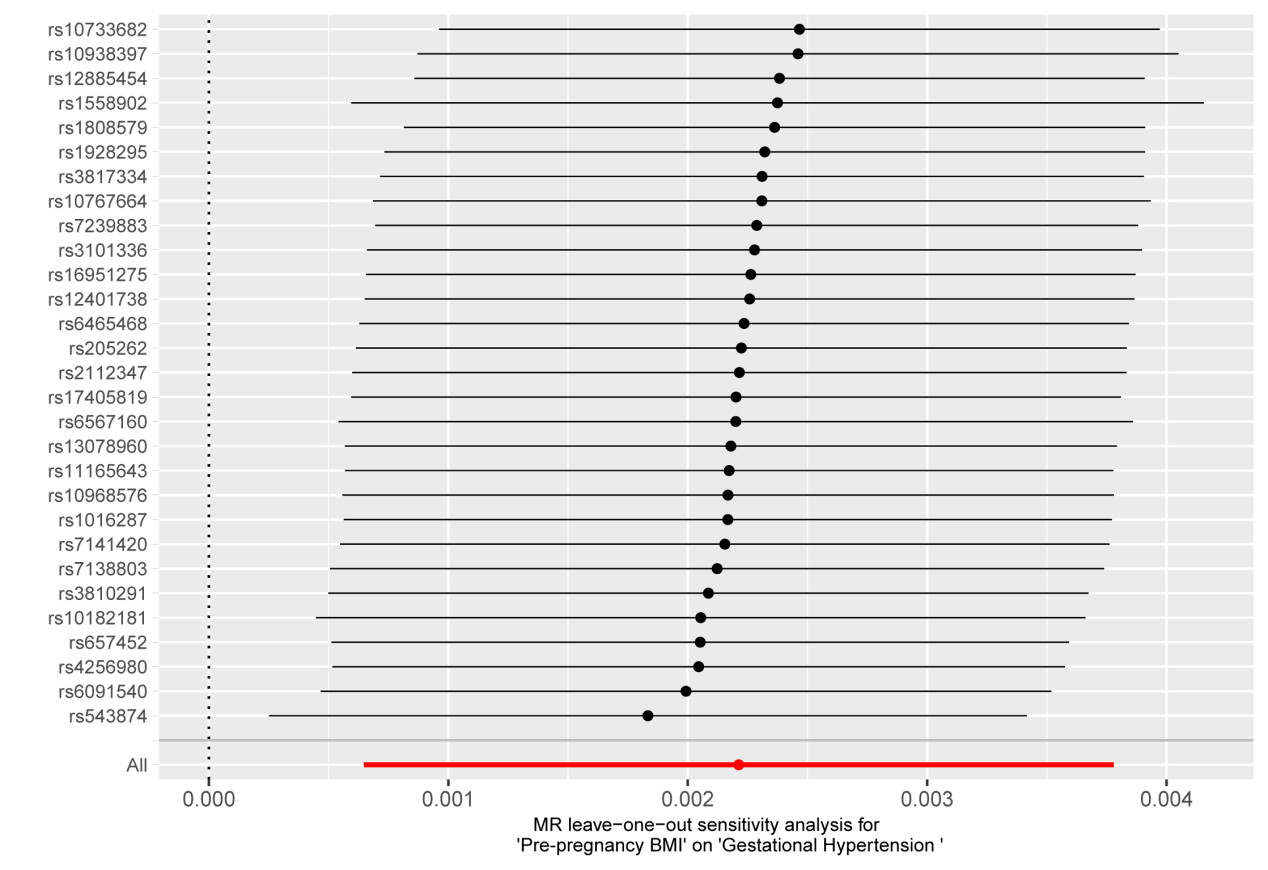


Supplementary Figure 1A:leave-one-out sensitivity analysis(MR analysis of Pre-pregnancy BMI and Gestational Hypertension)


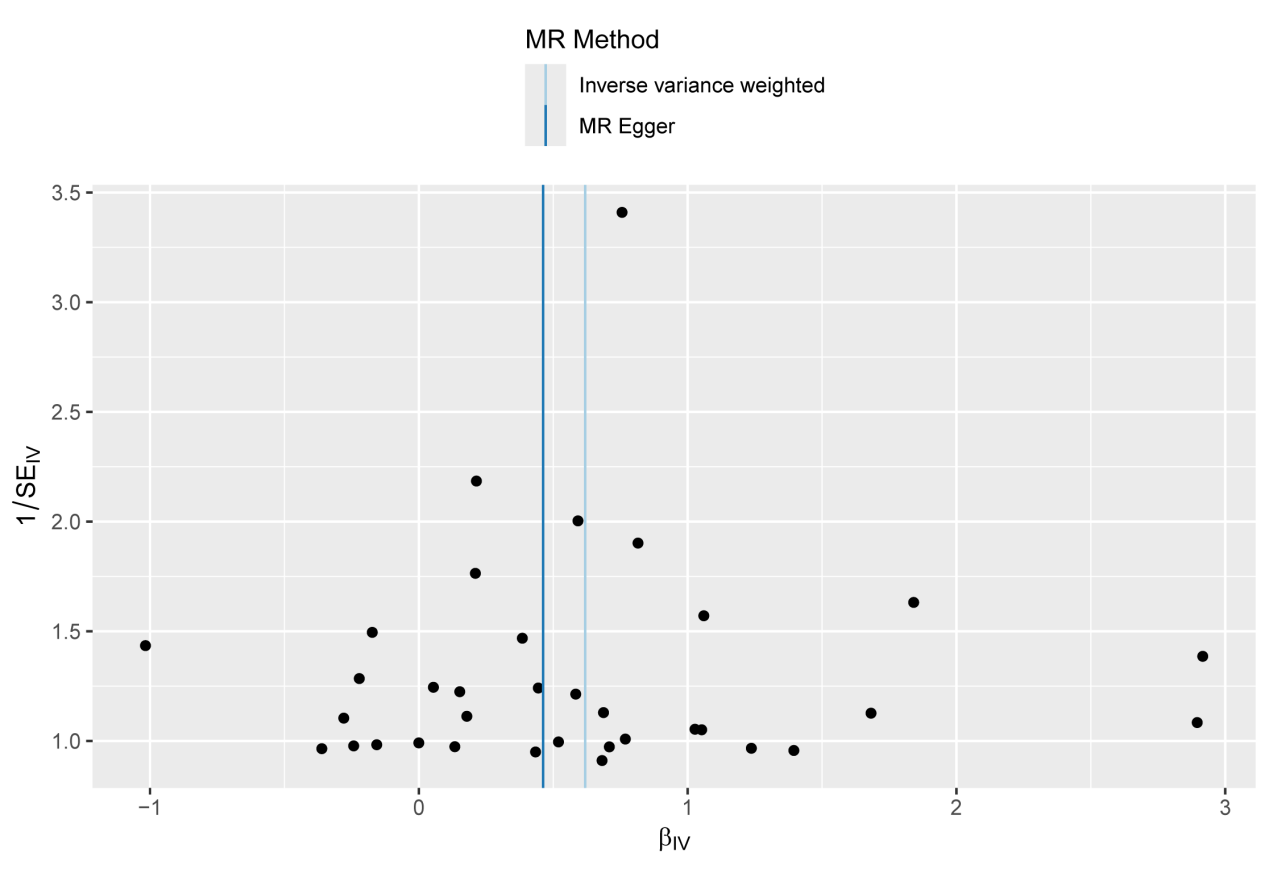


Supplementary Figure 1B:funnel plots sensitivity analysis(MR analysis of Pre-pregnancy BMI and Gestational Hypertension)


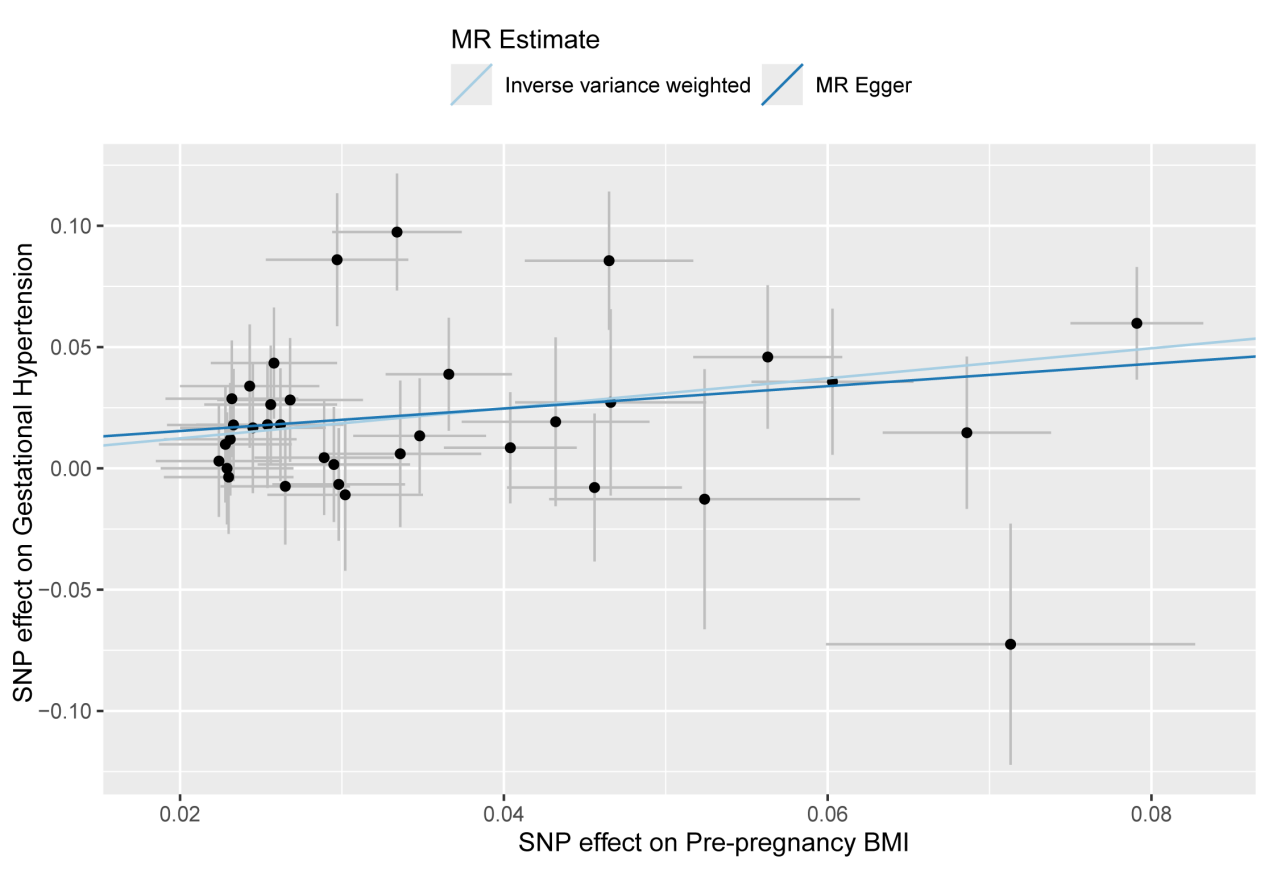


Supplementary Figure 1C:scatter plots sensitivity analysis(MR analysis of Pre-pregnancy BMI and Gestational Hypertension)


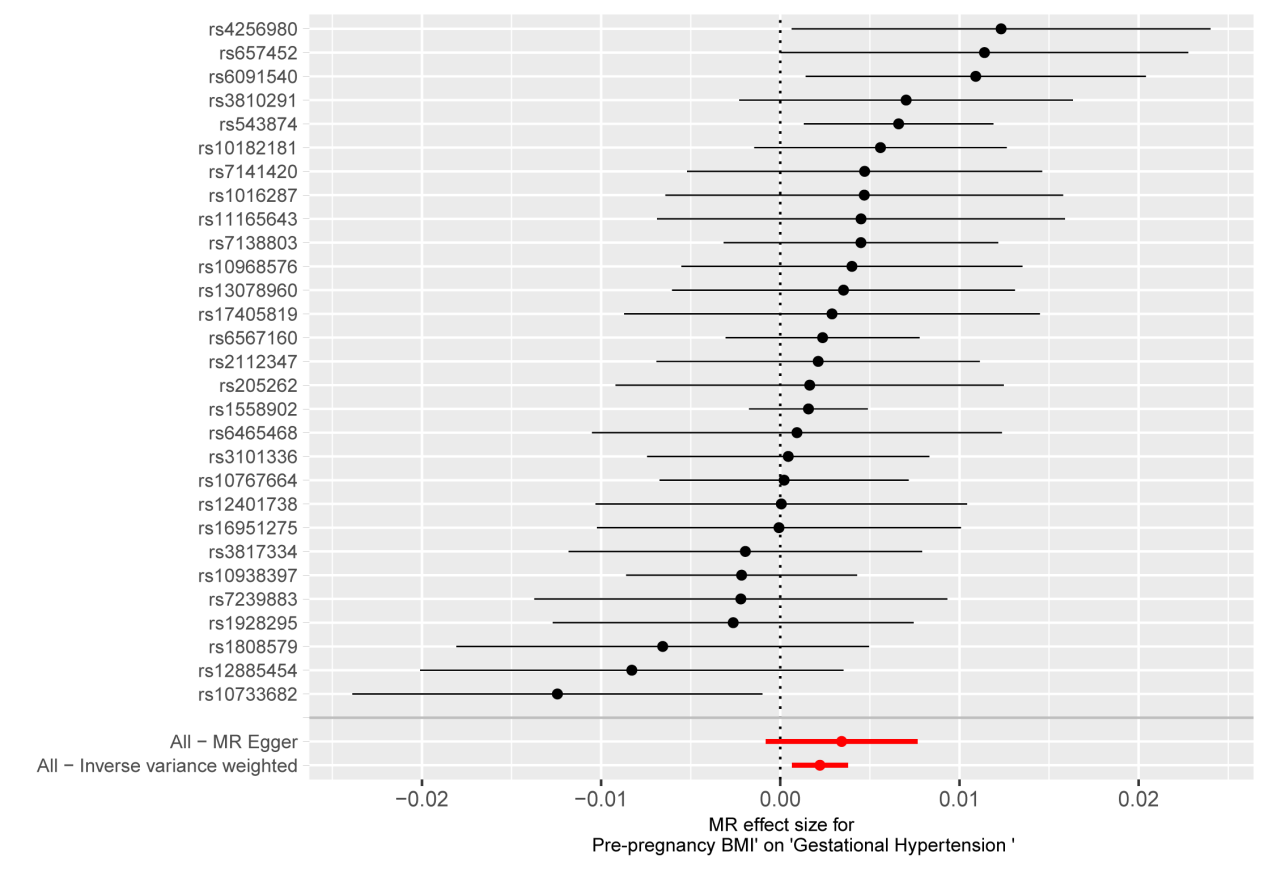


Supplementary Figure 1D: forest plots sensitivity analysis(MR analysis of Pre-pregnancy BMI and Gestational Hypertension)


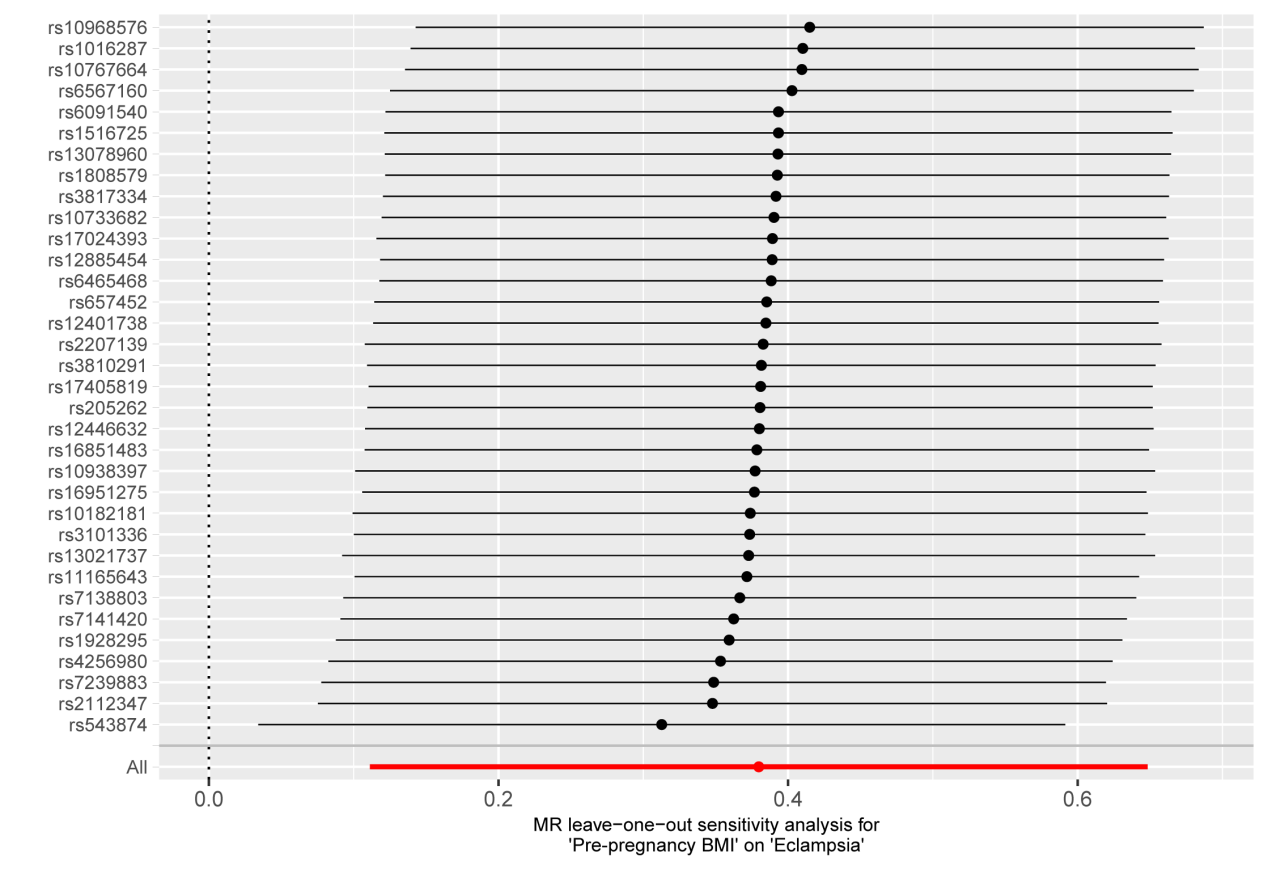


Supplementary Figure 2A:leave-one-out sensitivity analysis(MR analysis of Pre-pregnancy BMI and Eclampsia)


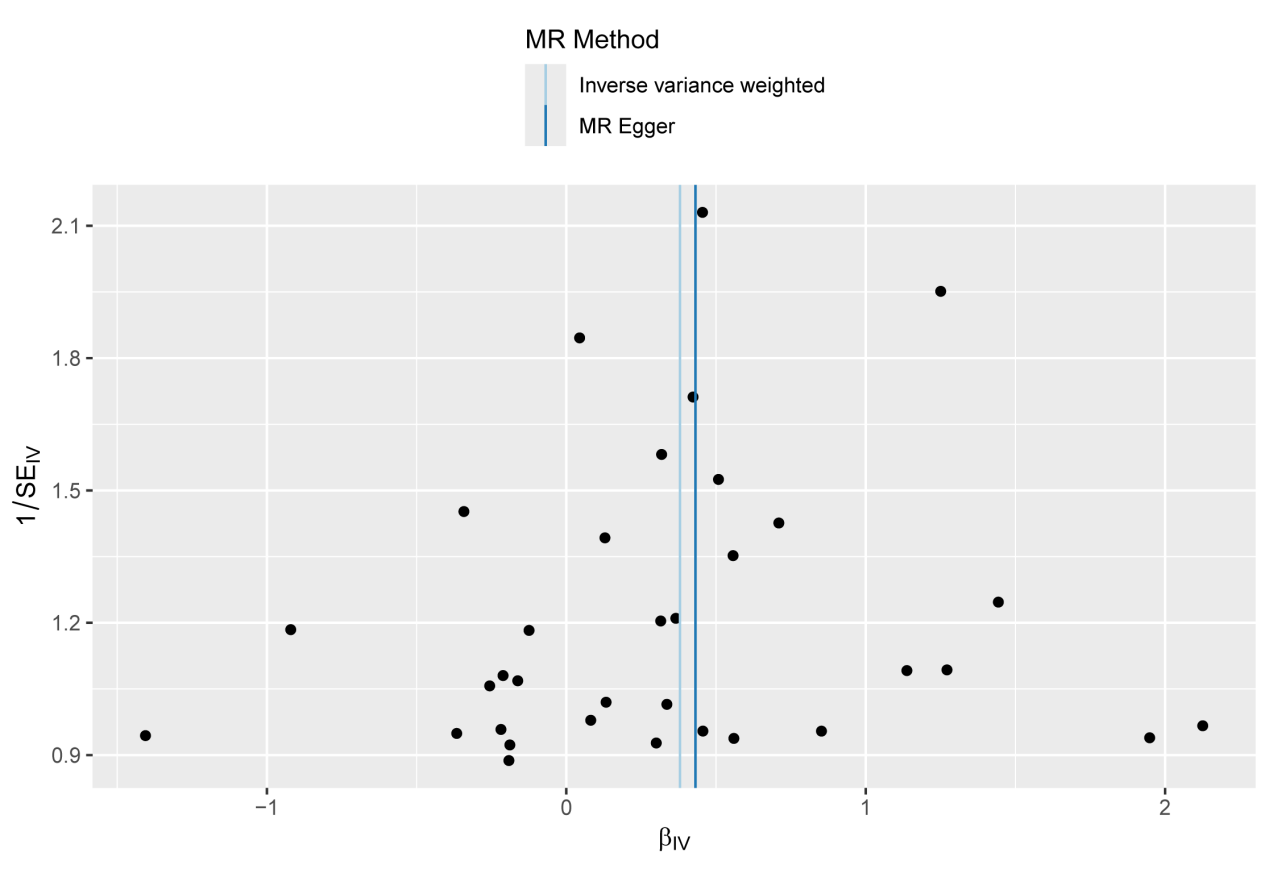


Supplementary Figure 2B:funnel plots sensitivity analysis(MR analysis of Pre-pregnancy BMI and Eclampsia)


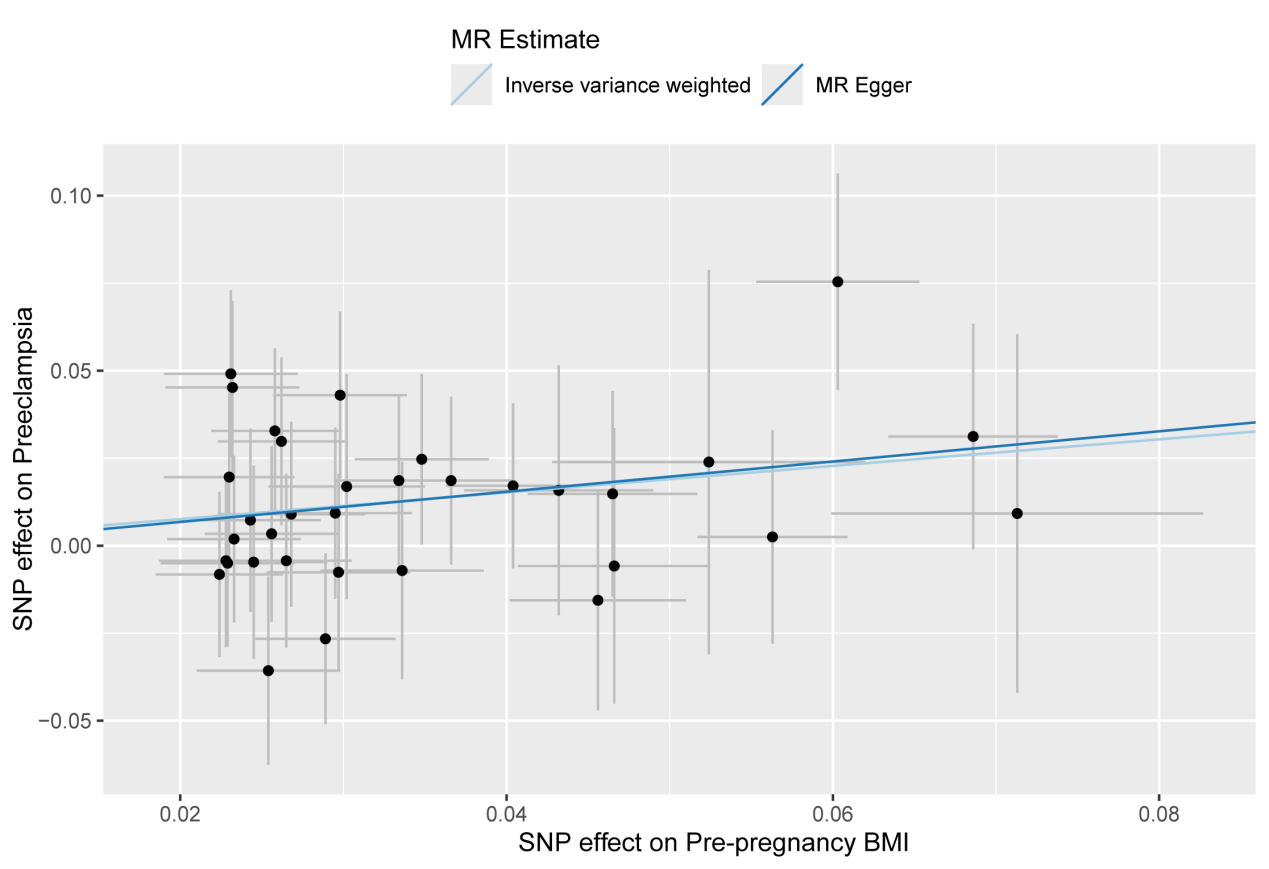


Supplementary Figure 2C:scatter plots sensitivity analysis(MR analysis of Pre-pregnancy BMI and Eclampsia)


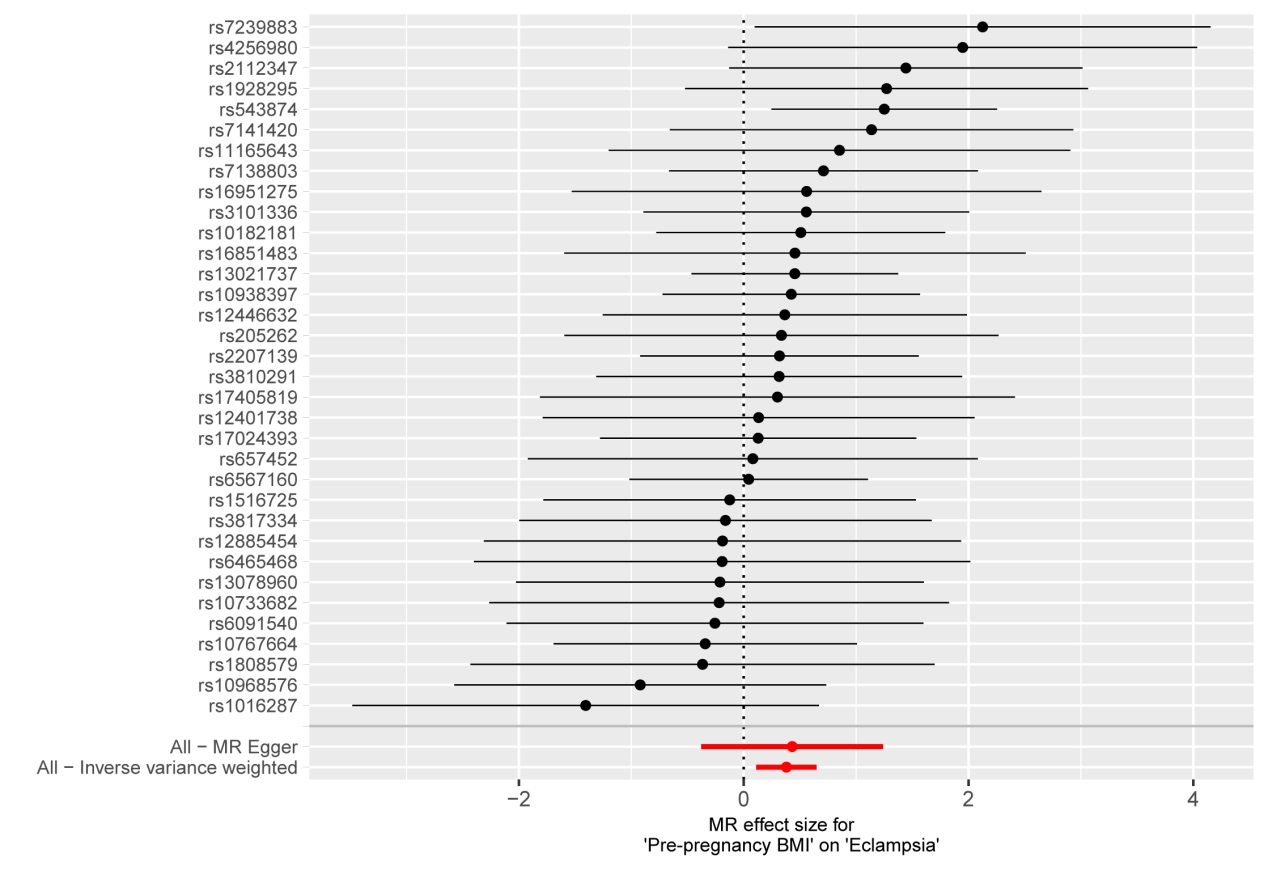


Supplementary Figure 2D: forest plots sensitivity analysis(MR analysis of Pre-pregnancy BMI and Eclampsia)


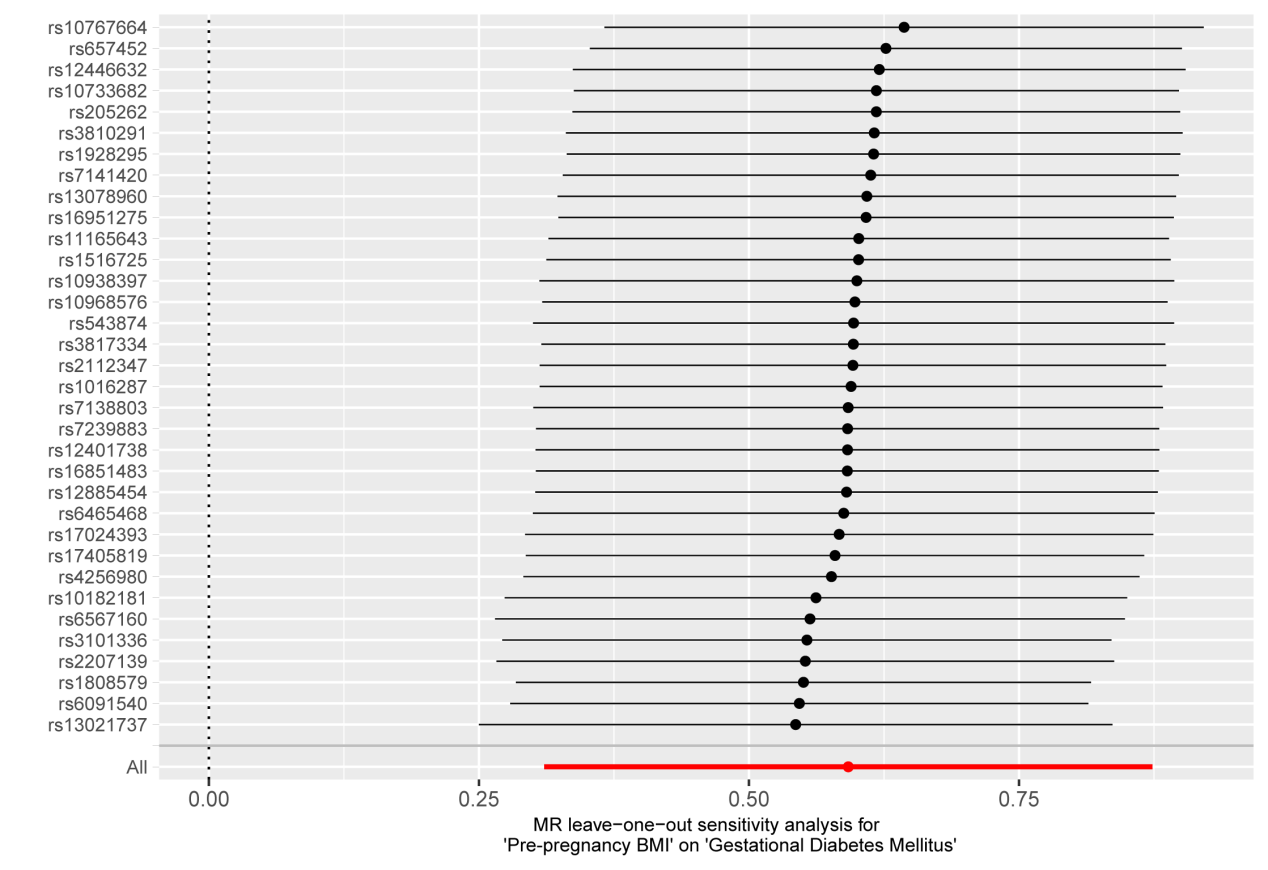


Supplementary Figure 3A:leave-one-out sensitivity analysis(MR analysis of Pre-pregnancy BMI and Gestational Diabetes Mellitus)


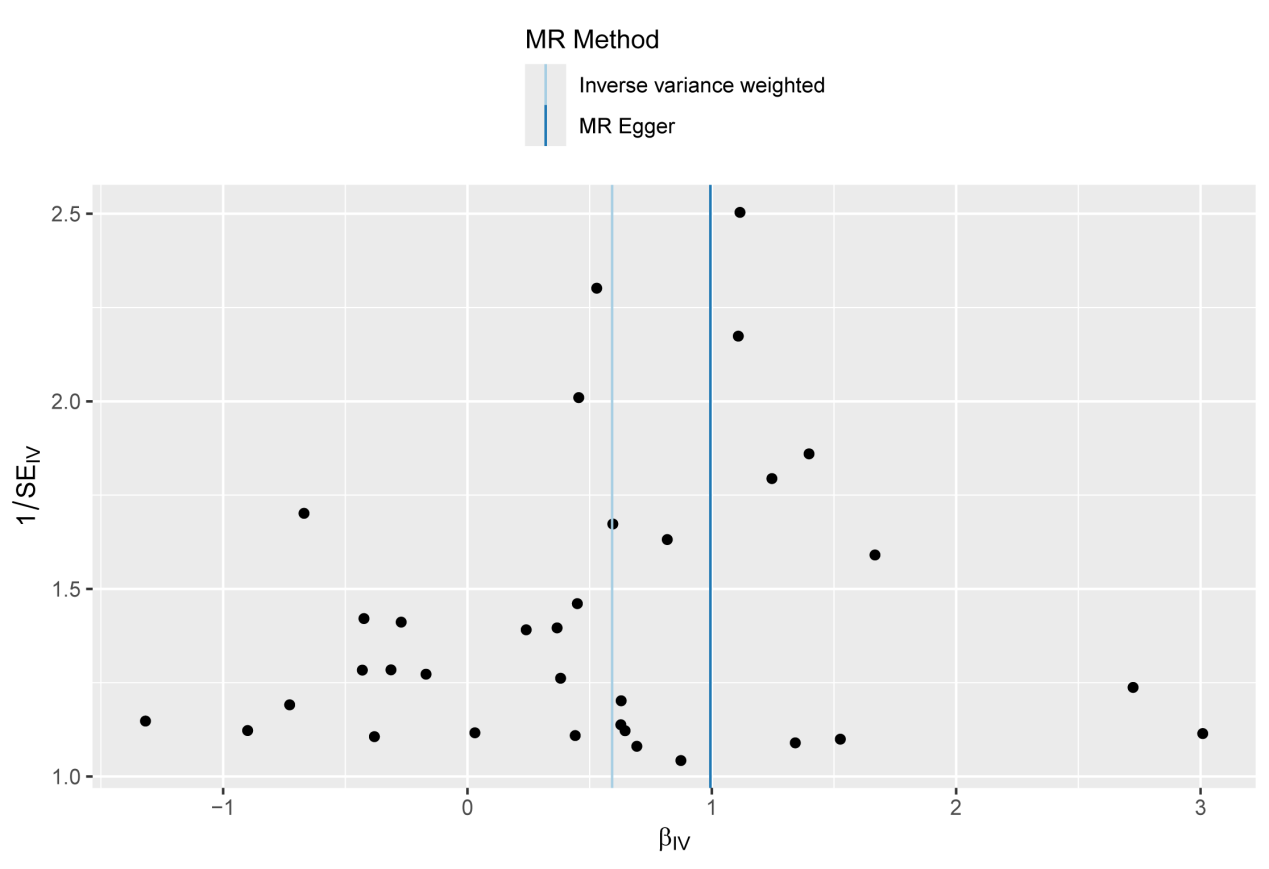


Supplementary Figure 3B:funnel plots sensitivity analysis(MR analysis of Pre-pregnancy BMI and Gestational Diabetes Mellitus)


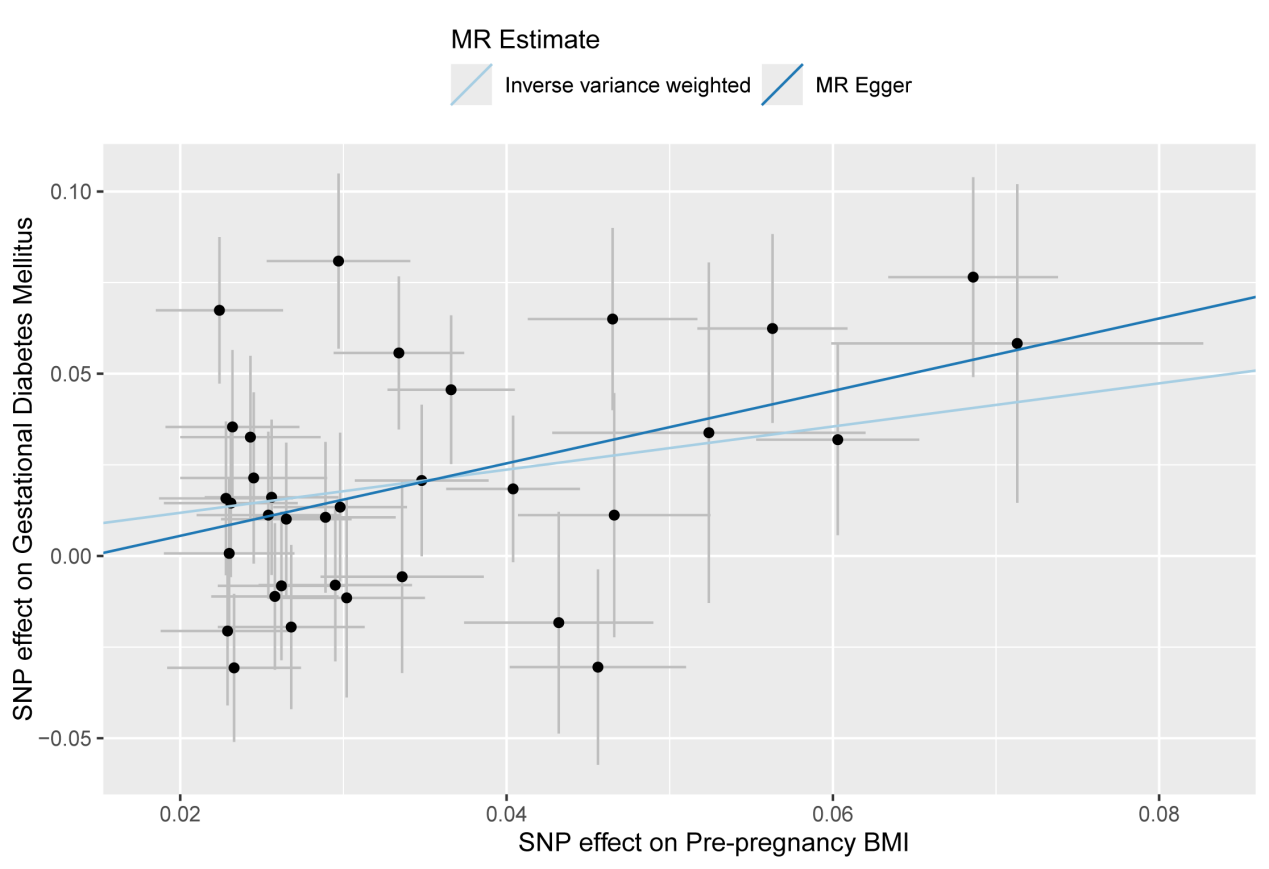


Supplementary Figure 3C:scatter plots sensitivity analysis(MR analysis of Pre-pregnancy BMI and Gestational Diabetes Mellitus)


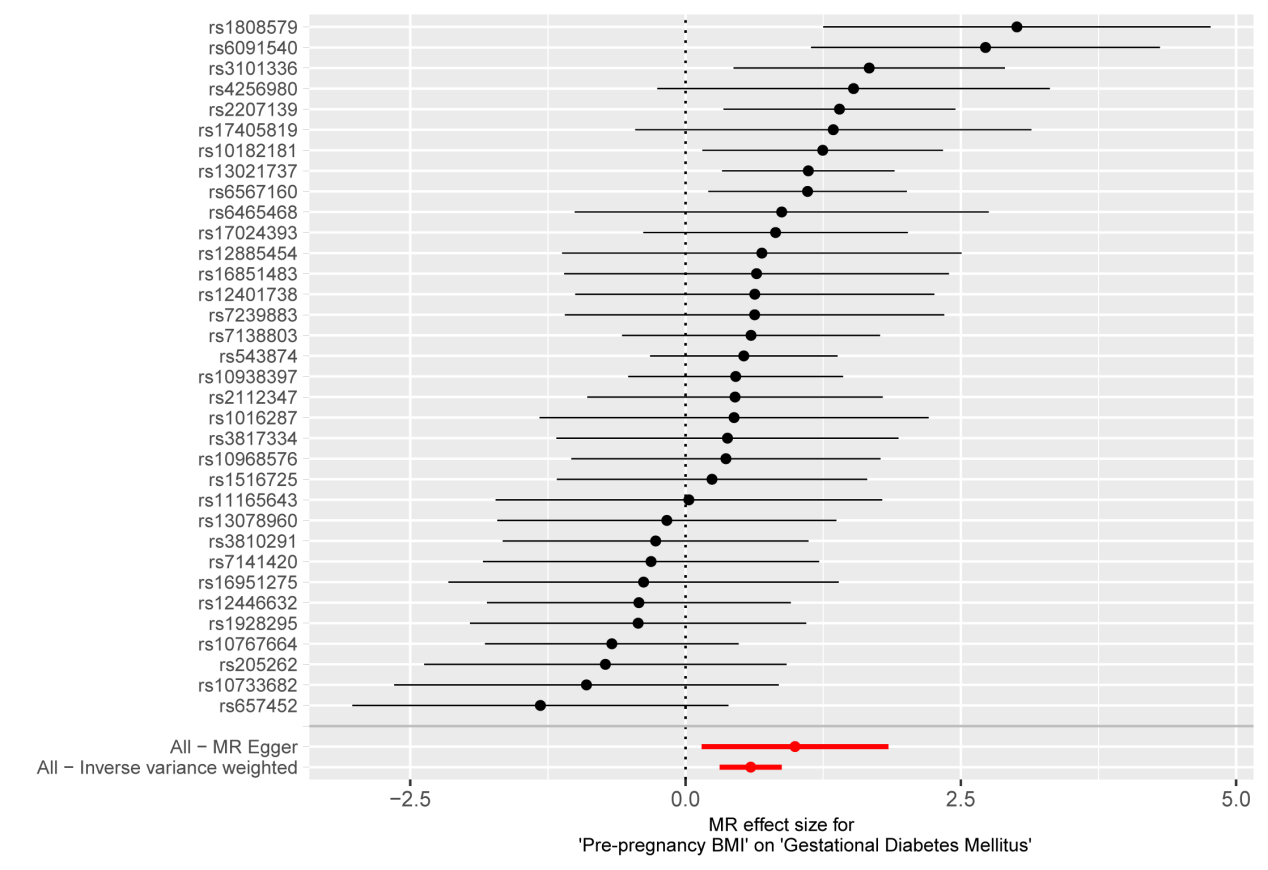


Supplementary Figure 3D: forest plots sensitivity analysis(MR analysis of Pre-pregnancy BMI and Gestational Diabetes Mellitus)


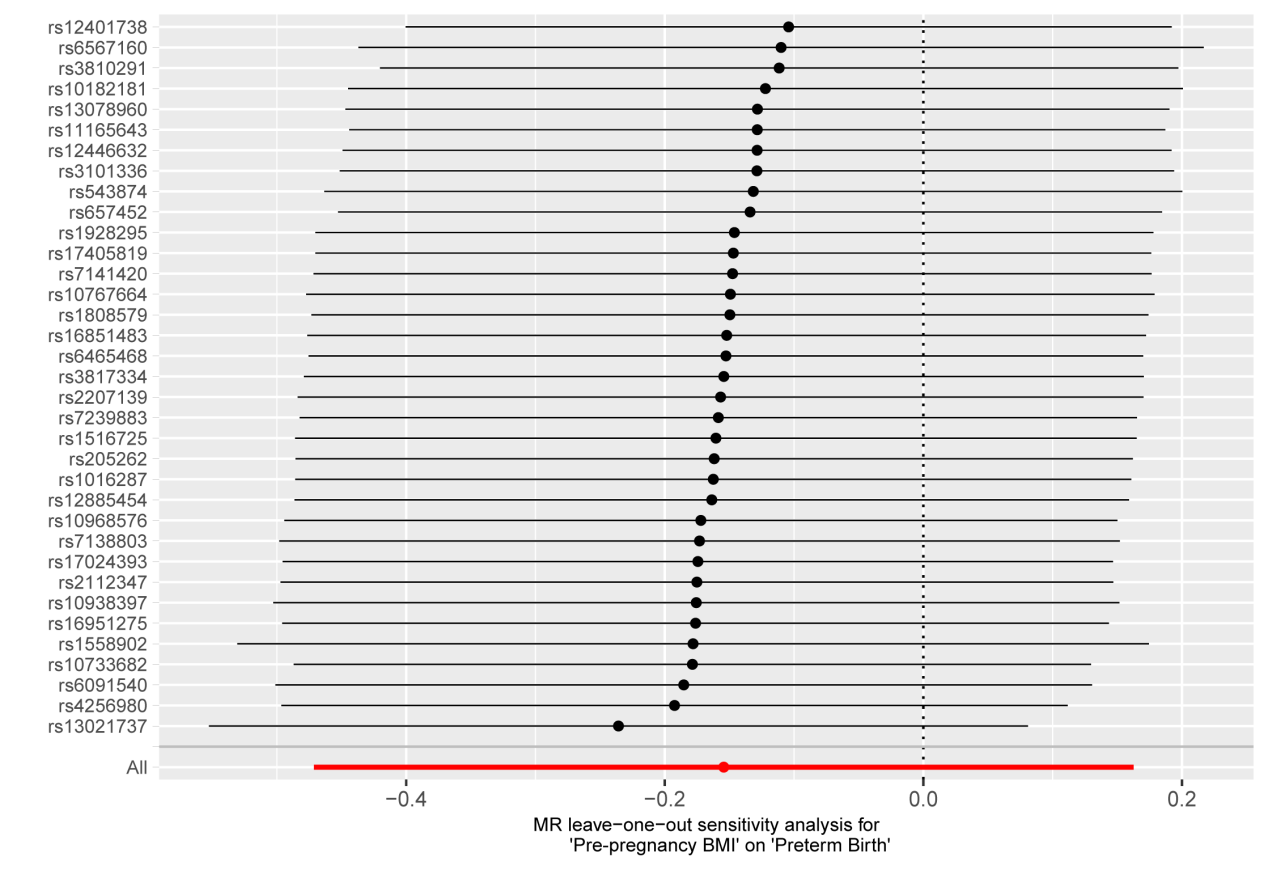


Supplementary Figure 4A:leave-one-out sensitivity analysis(MR analysis of Pre-pregnancy BMI and Preterm Birth)


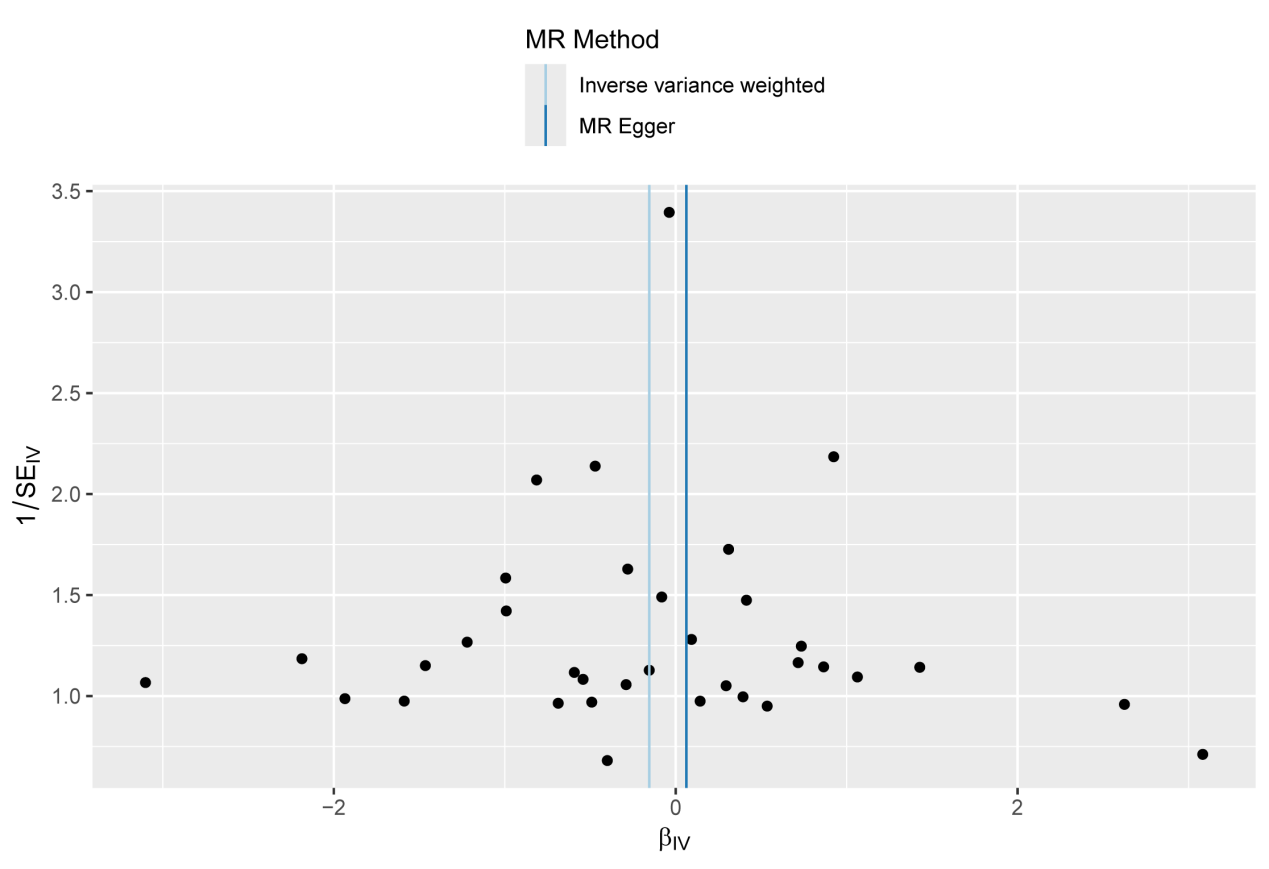


Supplementary Figure 4B:funnel plots sensitivity analysis(MR analysis of Pre-pregnancy BMI and Preterm Birth)


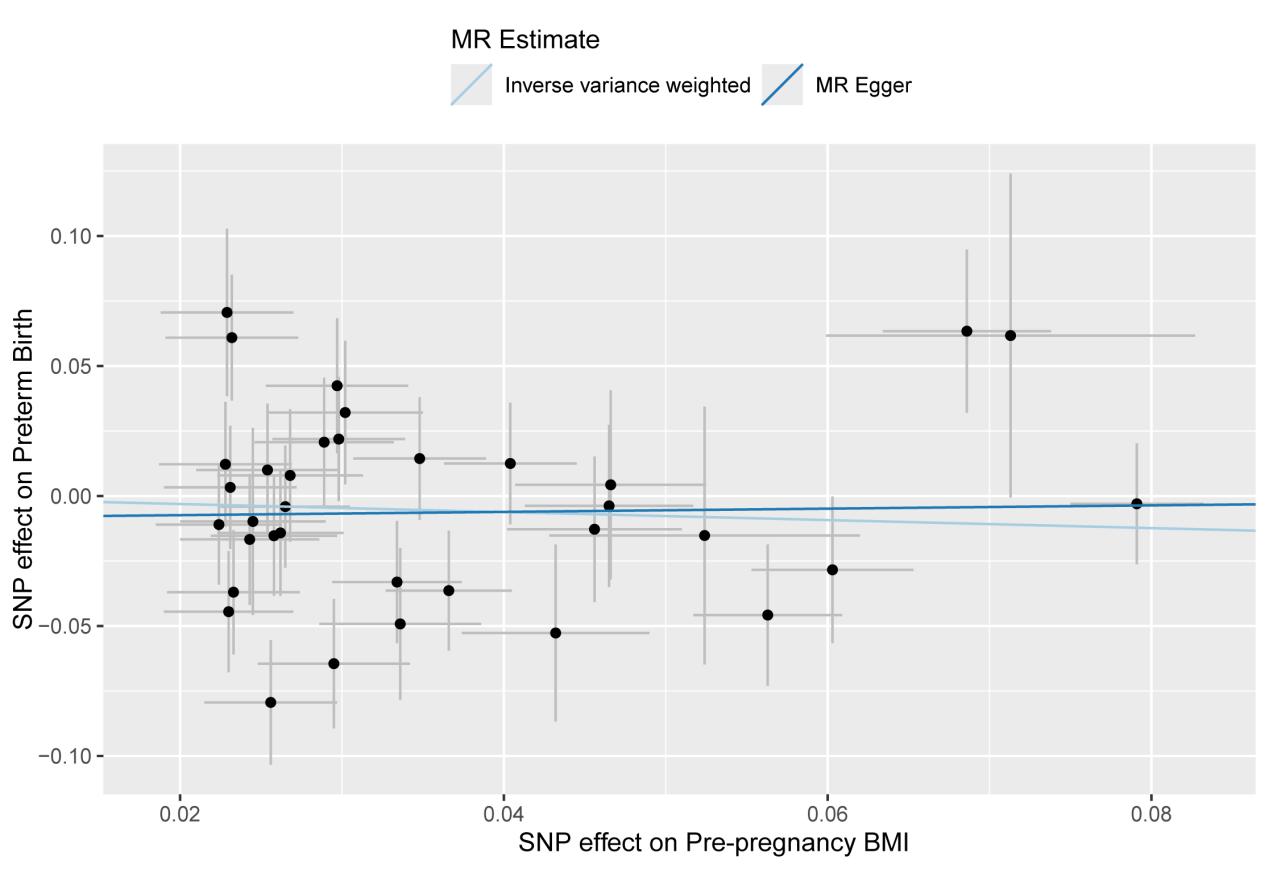


Supplementary Figure 4C:scatter plots sensitivity analysis(MR analysis of Pre-pregnancy BMI and Preterm Birth)


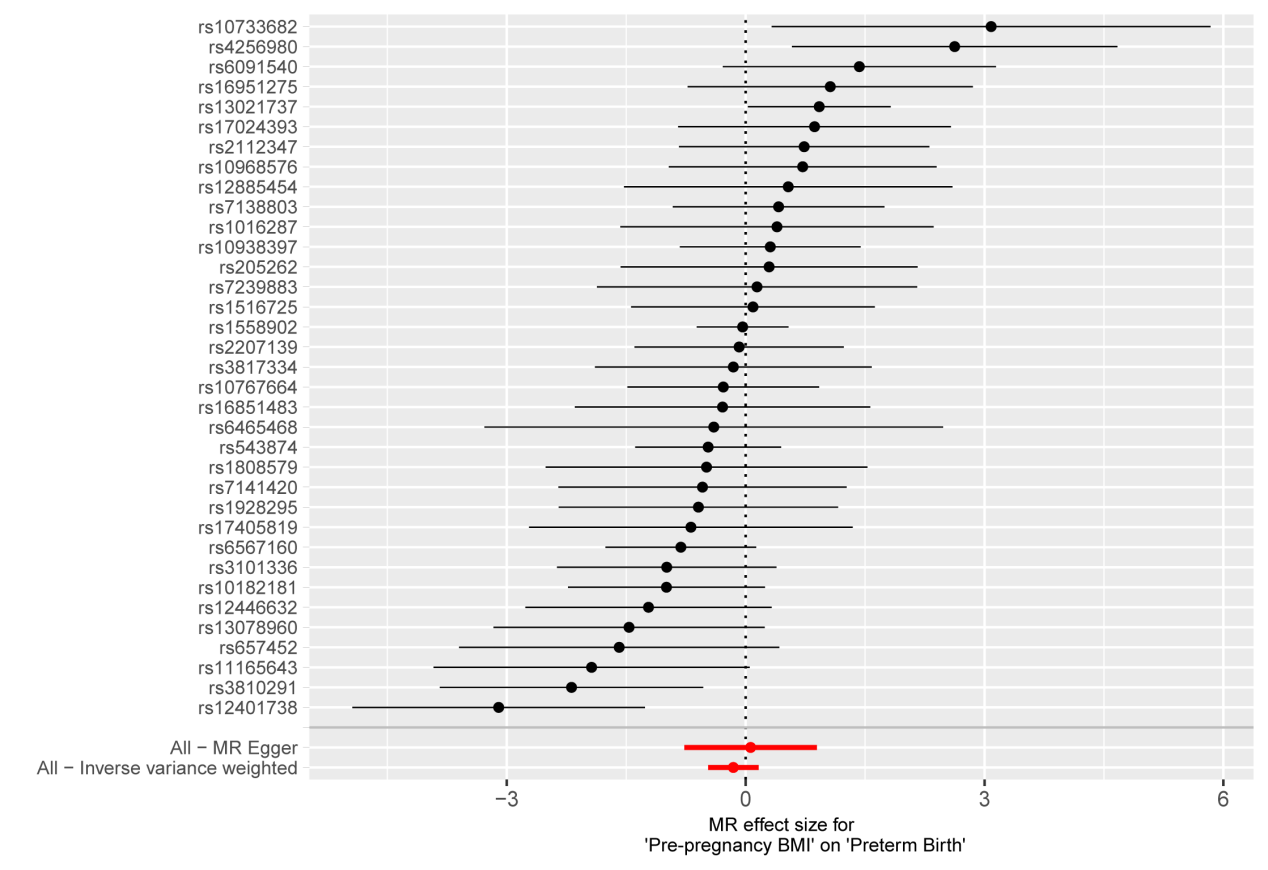


Supplementary Figure 4D: forest plots sensitivity analysis(MR analysis of Pre-pregnancy BMI and Preterm Birth)


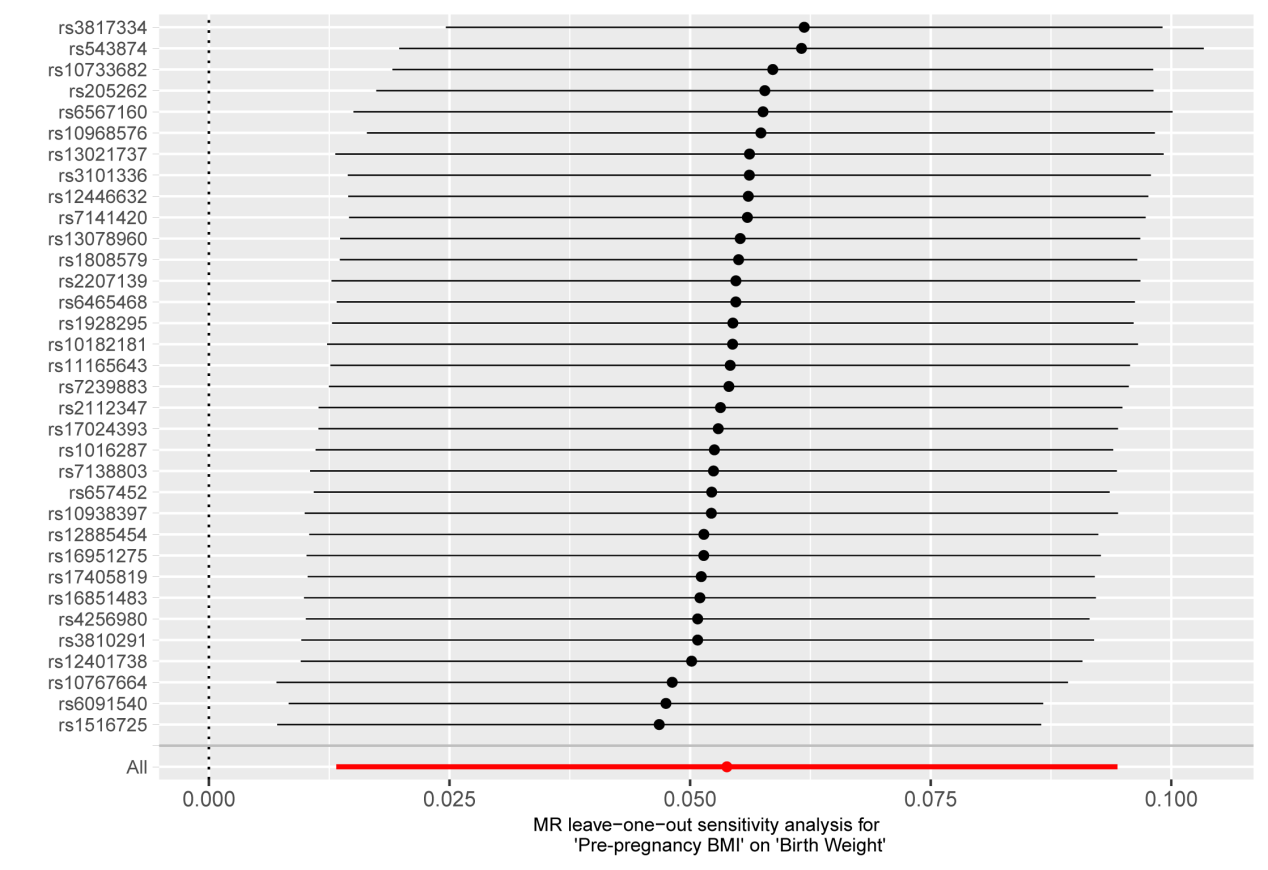


Supplementary Figure 5A:leave-one-out sensitivity analysis(MR analysis of Pre-pregnancy BMI and Birthweight)


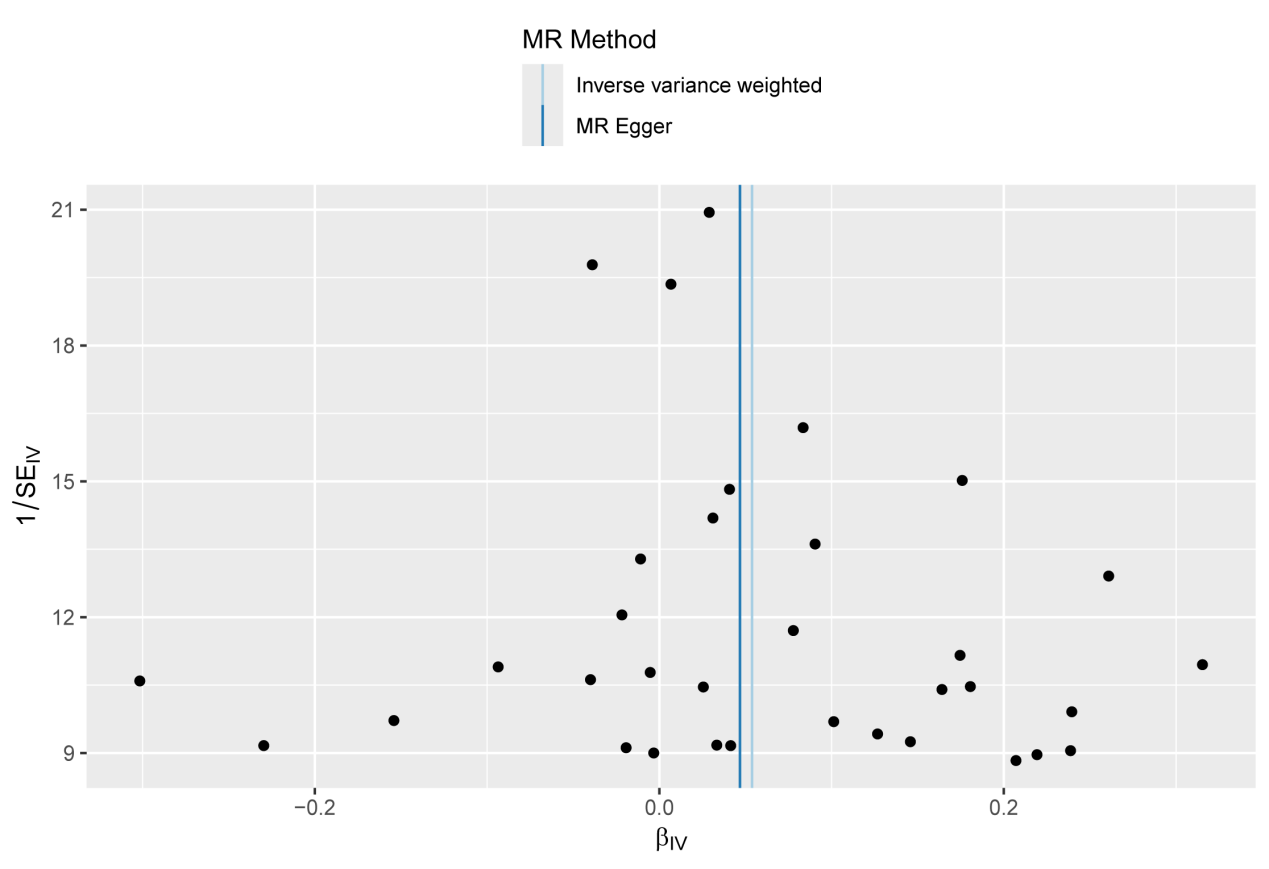


Supplementary Figure 5B:funnel plots sensitivity analysis(MR analysis of Pre-pregnancy BMI and Birthweight)


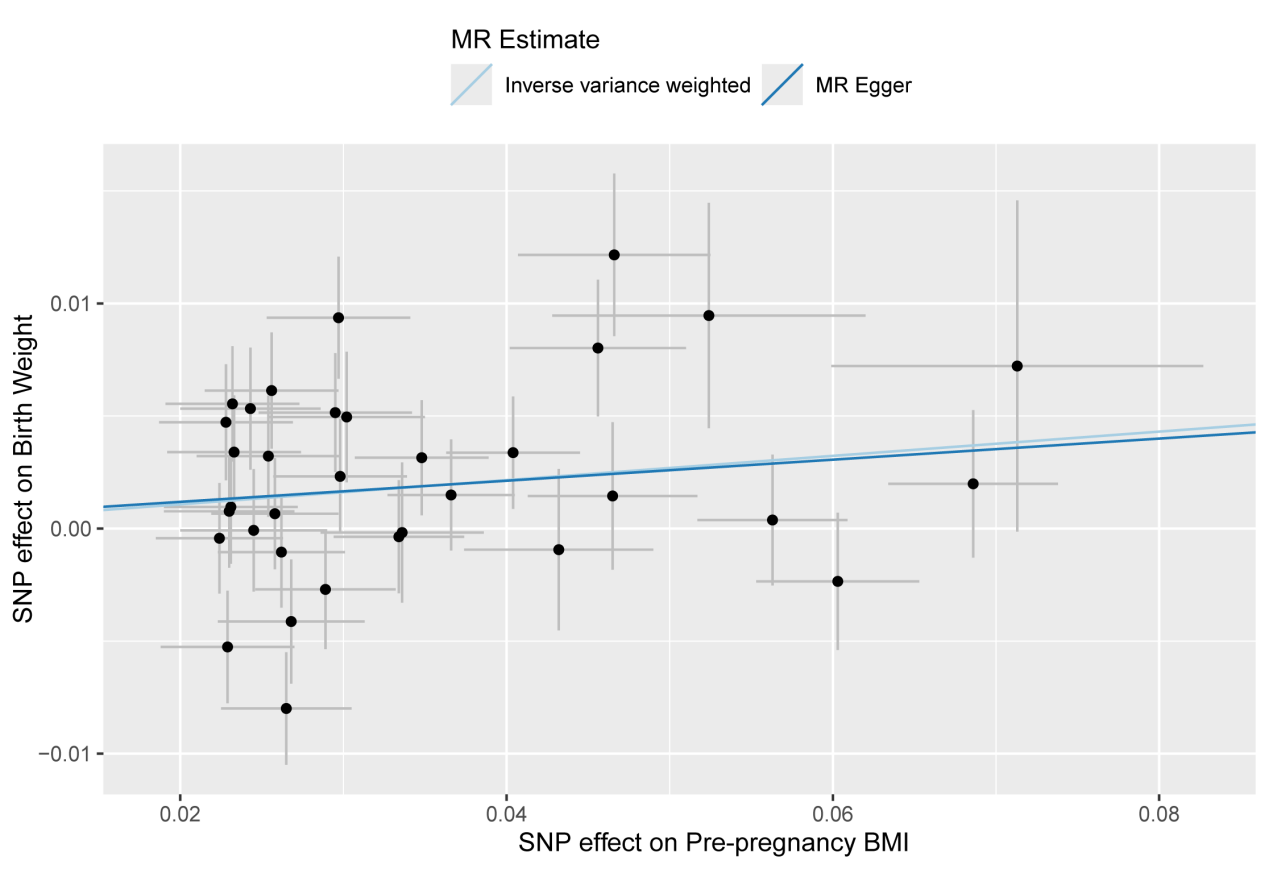


Supplementary Figure 5C:scatter plots sensitivity analysis(MR analysis of Pre-pregnancy BMI and Birthweight)


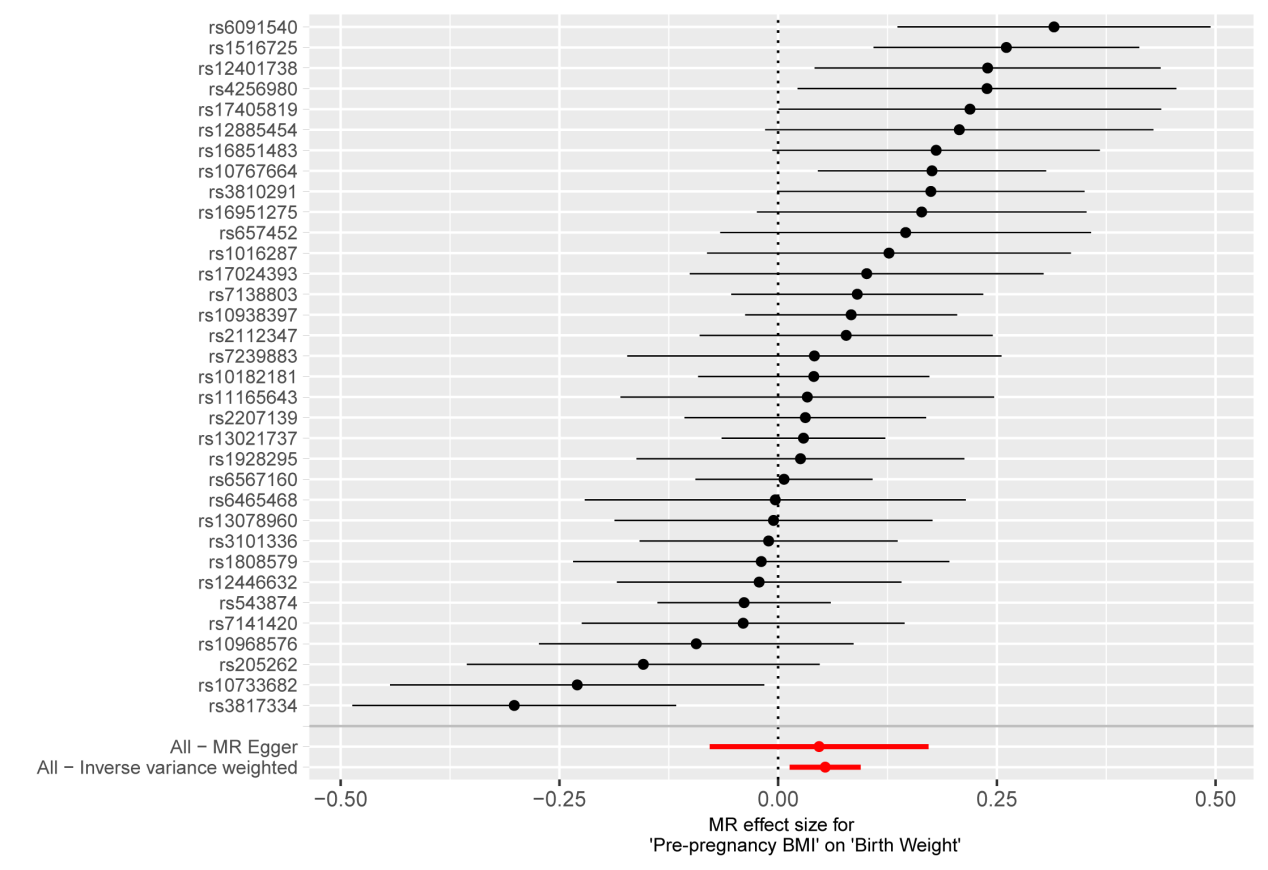


Supplementary Figure 5D: forest plots sensitivity analysis(MR analysis of Pre-pregnancy BMI and Birthweight)
