# Supplementary material for: Pre-pregnancy Body Mass Index and Adverse Pregnancy Outcomes: A Cross-Sectional Analysis Followed by Mendelian Randomization Study
Source: Research Square preprint supplement (doi:10.21203/rs.3.rs-8723004/v1), 2026-02-11
Supplement: Supplementary file 2 [file 6796850163e8894aef936458.xlsx]

## Sheet: Supplementary Table Captions
Supplementary Table Captions
Supplementary Table S1: Details of the genome-wide association studies and datasets used in our Mendelian Randomization (MR) study.
Supplementary Table S2: Details of the genetic variants used in the Mendelian randomization analysis of Pre-pregnancy BMI and Gestational Hypertension
Supplementary Table S3: Details of the genetic variants used in the Mendelian randomization analysis of Pre-pregnancy BMI and Eclampsia
Supplementary Table S4: Details of the genetic variants used in the Mendelian randomization analysis of Pre-pregnancy BMI and Gestational Diabetes Mellitus
Supplementary Table S5: Details of the genetic variants used in the Mendelian randomization analysis of Pre-pregnancy BMI and Preterm Birth
Supplementary Table S6: Details of the genetic variants used in the Mendelian randomization analysis of Pre-pregnancy BMI and Birthweight

## Sheet: Supplementary Table S1
Supplementary Table S1. Details of the genome-wide association studies and datasets used in our Mendelian Randomization (MR) study.
Exposure or outcome	Study or population	Links for data download
Pre-pregnancy body mass index	Meta analysis from GIANT consortium	GIANT consortium website (https://giant-consortium.web.broadinstitute.org/GIANT_consortium_data_files)
Gestational Hypertension	IEU OpenGWAS Database	https://opengwas.io/datasets/finn-b-O15_GESTAT_HYPERT
Eclampsia	IEU OpenGWAS Database	https://opengwas.io/datasets/finn-b-O15_PRE_OR_ECLAMPSIA
Gestational Diabetes Mellitus	IEU OpenGWAS Database	https://opengwas.io/datasets/finn-b-GEST_DIABETES
Preterm Birth	Early Growth Genetics Consortium	https://egg-consortium.org/Gestational-duration-2023.html
Birthweight	Early Growth Genetics Consortium	https://egg-consortium.org/birth-weight-2019.html

## Sheet: Supplementary Table S2
Supplementary Table S2: Details of the genetic variants used in the Mendelian randomization analysis of Pre-pregnancy BMI and Gestational Hypertension
SNP	effect_allele.exposure	other_allele.exposure	effect_allele.outcome	other_allele.outcome	beta.exposure	beta.outcome	eaf.exposure	eaf.outcome	se.outcome	pval.outcome	exposure	outcome	se.exposure	pval.exposure
rs1016287	T	C	T	C	0.0254	0.018	0.675	0.2574	0.0261	0.490300120520539	Pre-pregnancy BMI	Gestational Hypertension	0.0044	5.87003e-09
rs10182181	G	A	G	A	0.0366	0.0388	0.5	0.4186	0.0233	0.0953300893338915	Pre-pregnancy BMI	Gestational Hypertension	0.0039	3.90931e-21
rs10733682	A	G	A	G	0.0229	0	0.575	0.5328	0.0231	0.999799999961851	Pre-pregnancy BMI	Gestational Hypertension	0.0041	1.66498e-08
rs10767664	A	T	A	T	0.0456	-0.0079	0.7833	0.8301	0.0305	0.796599996197055	Pre-pregnancy BMI	Gestational Hypertension	0.0054	1.87715e-17
rs10938397	G	A	G	A	0.0404	0.0085	0.4333	0.4741	0.0229	0.711700056001122	Pre-pregnancy BMI	Gestational Hypertension	0.0041	2.98401e-23
rs10968576	G	A	G	A	0.0289	0.0044	0.2917	0.3734	0.0236	0.851699907346263	Pre-pregnancy BMI	Gestational Hypertension	0.0043	1.0349e-11
rs11165643	T	C	T	C	0.023	-0.0036	0.575	0.5988	0.0234	0.877999967843115	Pre-pregnancy BMI	Gestational Hypertension	0.004	5.75705e-09
rs12401738	A	G	A	G	0.0256	0.0263	0.425	0.3351	0.0243	0.278199919507377	Pre-pregnancy BMI	Gestational Hypertension	0.0041	6.09004e-10
rs12446632	G	A	G	A	0.0432	0.0192	0.1333	0.8751	0.0348	0.580499700490628	Pre-pregnancy BMI	Gestational Hypertension	0.0058	1.44611e-13
rs12885454	C	A	C	A	0.0228	0.0099	0.3667	0.6462	0.024	0.679300602836661	Pre-pregnancy BMI	Gestational Hypertension	0.0041	2.89101e-08
rs13021737	G	A	G	A	0.0686	0.0147	0.875	0.8373	0.0314	0.640000038338762	Pre-pregnancy BMI	Gestational Hypertension	0.0052	6.98715e-40
rs13078960	G	T	G	T	0.0336	0.006	0.1833	0.1729	0.0302	0.843500025394385	Pre-pregnancy BMI	Gestational Hypertension	0.005	1.40994e-11
rs1516725	C	T	C	T	0.0466	0.0272	0.9083	0.8996	0.0384	0.47909981151471	Pre-pregnancy BMI	Gestational Hypertension	0.0059	1.91382e-15
rs1558902	A	T	A	T	0.0791	0.0598	0.45	0.4171	0.0232	0.00995497101800706	Pre-pregnancy BMI	Gestational Hypertension	0.0041	4.03181e-84
rs16851483	T	G	T	G	0.0524	-0.0127	0.0917	0.04868	0.0536	0.812299900431027	Pre-pregnancy BMI	Gestational Hypertension	0.0096	4.80596e-08
rs16951275	T	C	T	C	0.0302	-0.0109	0.225	0.8391	0.0313	0.726900554250229	Pre-pregnancy BMI	Gestational Hypertension	0.0048	2.96101e-10
rs17024393	C	T	C	T	0.0713	-0.0725	0.04167	0.05551	0.0497	0.144700156223748	Pre-pregnancy BMI	Gestational Hypertension	0.0114	3.53102e-10
rs17405819	T	C	T	C	0.0243	0.0339	0.3667	0.7163	0.0254	0.18139988190932	Pre-pregnancy BMI	Gestational Hypertension	0.0043	1.45301e-08
rs1808579	C	T	C	T	0.0224	0.003	0.475	0.5076	0.023	0.897699947945049	Pre-pregnancy BMI	Gestational Hypertension	0.0039	1.232e-08
rs1928295	T	C	T	C	0.0258	0.0434	0.425	0.4857	0.0229	0.0580296565247212	Pre-pregnancy BMI	Gestational Hypertension	0.0039	3.42137e-11
rs205262	G	A	G	A	0.0268	0.0282	0.2667	0.2822	0.0255	0.268499820687278	Pre-pregnancy BMI	Gestational Hypertension	0.0045	2.04099e-09
rs2112347	T	G	T	G	0.0298	-0.0066	0.375	0.5856	0.0232	0.775300385656483	Pre-pregnancy BMI	Gestational Hypertension	0.0041	3.14775e-13
rs2207139	G	A	G	A	0.0465	0.0856	0.1	0.2025	0.0285	0.00269898207347202	Pre-pregnancy BMI	Gestational Hypertension	0.0052	2.40381e-19
rs3101336	C	T	C	T	0.0334	0.0974	0.6491	0.6463	0.0241	5.19098770211458e-05	Pre-pregnancy BMI	Gestational Hypertension	0.004	8.90841e-17
rs3810291	A	G	A	G	0.0295	0.0016	0.625	0.632	0.0237	0.944899893413002	Pre-pregnancy BMI	Gestational Hypertension	0.0047	2.60298e-10
rs3817334	T	C	T	C	0.0265	-0.0074	0.45	0.3969	0.024	0.758099133071536	Pre-pregnancy BMI	Gestational Hypertension	0.004	2.46888e-11
rs4256980	G	C	G	C	0.0232	0.0287	0.725	0.6479	0.024	0.231600237279604	Pre-pregnancy BMI	Gestational Hypertension	0.0041	1.652e-08
rs543874	G	A	G	A	0.0603	0.0357	0.2667	0.1771	0.0301	0.235800108177801	Pre-pregnancy BMI	Gestational Hypertension	0.005	9.61391e-34
rs6091540	C	T	C	T	0.0297	0.086	0.275	0.7705	0.0274	0.00169500116095511	Pre-pregnancy BMI	Gestational Hypertension	0.0044	2.15377e-11
rs6465468	T	G	T	G	0.0245	0.0167	0.325	0.2454	0.0269	0.534500357472555	Pre-pregnancy BMI	Gestational Hypertension	0.0045	4.98001e-08
rs6567160	C	T	C	T	0.0563	0.0459	0.2833	0.1844	0.0296	0.121799919145771	Pre-pregnancy BMI	Gestational Hypertension	0.0046	5.08276e-34
rs657452	A	G	A	G	0.0233	0.0179	0.5833	0.4262	0.0231	0.438600376353127	Pre-pregnancy BMI	Gestational Hypertension	0.0041	1.69899e-08
rs7138803	A	G	A	G	0.0348	0.0134	0.4417	0.3844	0.0237	0.571899872862682	Pre-pregnancy BMI	Gestational Hypertension	0.0041	1.80302e-17
rs7141420	T	C	T	C	0.0262	0.018	0.6167	0.5884	0.0232	0.439399946797334	Pre-pregnancy BMI	Gestational Hypertension	0.0039	1.45011e-11
rs7239883	G	A	G	A	0.0231	0.012	0.6833	0.4314	0.0232	0.605399419237469	Pre-pregnancy BMI	Gestational Hypertension	0.0041	1.51098e-08

## Sheet: Supplementary Table S3
Supplementary Table S3: Details of the genetic variants used in the Mendelian randomization analysis of Pre-pregnancy BMI and Eclampsia
SNP	effect_allele.exposure	other_allele.exposure	effect_allele.outcome	other_allele.outcome	beta.exposure	beta.outcome	eaf.exposure	eaf.outcome	se.outcome	pval.outcome	exposure	outcome	se.exposure	pval.exposure
rs1016287	T	C	T	C	0.0254	-0.0357	0.675	0.257	0.0269	0.184800014091408	Pre-pregnancy BMI	Eclampsia	0.0044	5.87003e-09
rs10182181	G	A	G	A	0.0366	0.0186	0.5	0.4184	0.024	0.437299519351961	Pre-pregnancy BMI	Eclampsia	0.0039	3.90931e-21
rs10733682	A	G	A	G	0.0229	-0.005	0.575	0.5327	0.0239	0.835000047136663	Pre-pregnancy BMI	Eclampsia	0.0041	1.66498e-08
rs10767664	A	T	A	T	0.0456	-0.0156	0.7833	0.8301	0.0314	0.619800610955236	Pre-pregnancy BMI	Eclampsia	0.0054	1.87715e-17
rs10938397	G	A	G	A	0.0404	0.0171	0.4333	0.4741	0.0236	0.469500436098997	Pre-pregnancy BMI	Eclampsia	0.0041	2.98401e-23
rs10968576	G	A	G	A	0.0289	-0.0266	0.2917	0.3731	0.0244	0.274499779546476	Pre-pregnancy BMI	Eclampsia	0.0043	1.0349e-11
rs11165643	T	C	T	C	0.023	0.0196	0.575	0.599	0.0241	0.416100272300474	Pre-pregnancy BMI	Eclampsia	0.004	5.75705e-09
rs12401738	A	G	A	G	0.0256	0.0034	0.425	0.3349	0.0251	0.893299930088455	Pre-pregnancy BMI	Eclampsia	0.0041	6.09004e-10
rs12446632	G	A	G	A	0.0432	0.0158	0.1333	0.875	0.0357	0.657400454501071	Pre-pregnancy BMI	Eclampsia	0.0058	1.44611e-13
rs12885454	C	A	C	A	0.0228	-0.0043	0.3667	0.6461	0.0247	0.863299918675916	Pre-pregnancy BMI	Eclampsia	0.0041	2.89101e-08
rs13021737	G	A	G	A	0.0686	0.0312	0.875	0.8373	0.0322	0.332900157018715	Pre-pregnancy BMI	Eclampsia	0.0052	6.98715e-40
rs13078960	G	T	G	T	0.0336	-0.0071	0.1833	0.1728	0.0311	0.820800098716982	Pre-pregnancy BMI	Eclampsia	0.005	1.40994e-11
rs1516725	C	T	C	T	0.0466	-0.0058	0.9083	0.8995	0.0394	0.882300042202367	Pre-pregnancy BMI	Eclampsia	0.0059	1.91382e-15
rs1558902	A	T	A	T	0.0791	0.0802	0.45	0.4172	0.0239	0.000798803575251462	Pre-pregnancy BMI	Eclampsia	0.0041	4.03181e-84
rs16851483	T	G	T	G	0.0524	0.0239	0.0917	0.04876	0.0549	0.662899970971953	Pre-pregnancy BMI	Eclampsia	0.0096	4.80596e-08
rs16951275	T	C	T	C	0.0302	0.0169	0.225	0.8392	0.0322	0.599200269469078	Pre-pregnancy BMI	Eclampsia	0.0048	2.96101e-10
rs17024393	C	T	C	T	0.0713	0.0092	0.04167	0.05565	0.0512	0.856899915491209	Pre-pregnancy BMI	Eclampsia	0.0114	3.53102e-10
rs17405819	T	C	T	C	0.0243	0.0073	0.3667	0.7162	0.0262	0.779600304366401	Pre-pregnancy BMI	Eclampsia	0.0043	1.45301e-08
rs1808579	C	T	C	T	0.0224	-0.0082	0.475	0.5076	0.0236	0.730299494448159	Pre-pregnancy BMI	Eclampsia	0.0039	1.232e-08
rs1928295	T	C	T	C	0.0258	0.0328	0.425	0.4856	0.0236	0.164799921313528	Pre-pregnancy BMI	Eclampsia	0.0039	3.42137e-11
rs205262	G	A	G	A	0.0268	0.009	0.2667	0.2821	0.0264	0.731499443390647	Pre-pregnancy BMI	Eclampsia	0.0045	2.04099e-09
rs2112347	T	G	T	G	0.0298	0.043	0.375	0.586	0.0239	0.0726892185546501	Pre-pregnancy BMI	Eclampsia	0.0041	3.14775e-13
rs2207139	G	A	G	A	0.0465	0.0148	0.1	0.2021	0.0294	0.615800447262421	Pre-pregnancy BMI	Eclampsia	0.0052	2.40381e-19
rs3101336	C	T	C	T	0.0334	0.0186	0.6491	0.6456	0.0247	0.451199905483384	Pre-pregnancy BMI	Eclampsia	0.004	8.90841e-17
rs3810291	A	G	A	G	0.0295	0.0093	0.625	0.6321	0.0245	0.705300188637933	Pre-pregnancy BMI	Eclampsia	0.0047	2.60298e-10
rs3817334	T	C	T	C	0.0265	-0.0043	0.45	0.397	0.0248	0.861100021352171	Pre-pregnancy BMI	Eclampsia	0.004	2.46888e-11
rs4256980	G	C	G	C	0.0232	0.0452	0.725	0.648	0.0247	0.0676892964274975	Pre-pregnancy BMI	Eclampsia	0.0041	1.652e-08
rs543874	G	A	G	A	0.0603	0.0754	0.2667	0.1773	0.0309	0.0148398667039609	Pre-pregnancy BMI	Eclampsia	0.005	9.61391e-34
rs6091540	C	T	C	T	0.0297	-0.0076	0.275	0.7699	0.0281	0.787800042677204	Pre-pregnancy BMI	Eclampsia	0.0044	2.15377e-11
rs6465468	T	G	T	G	0.0245	-0.0047	0.325	0.2453	0.0276	0.863800000573859	Pre-pregnancy BMI	Eclampsia	0.0045	4.98001e-08
rs6567160	C	T	C	T	0.0563	0.0025	0.2833	0.1842	0.0305	0.935299926033428	Pre-pregnancy BMI	Eclampsia	0.0046	5.08276e-34
rs657452	A	G	A	G	0.0233	0.0019	0.5833	0.426	0.0238	0.935999894958684	Pre-pregnancy BMI	Eclampsia	0.0041	1.69899e-08
rs7138803	A	G	A	G	0.0348	0.0247	0.4417	0.3845	0.0244	0.311200294997088	Pre-pregnancy BMI	Eclampsia	0.0041	1.80302e-17
rs7141420	T	C	T	C	0.0262	0.0298	0.6167	0.5885	0.024	0.21449985354712	Pre-pregnancy BMI	Eclampsia	0.0039	1.45011e-11
rs7239883	G	A	G	A	0.0231	0.0491	0.6833	0.4317	0.0239	0.0399199510424563	Pre-pregnancy BMI	Eclampsia	0.0041	1.51098e-08

## Sheet: Supplementary Table S4
Supplementary Table S4: Details of the genetic variants used in the Mendelian randomization analysis of Pre-pregnancy BMI and Gestational Diabetes Mellitus
SNP	effect_allele.exposure	other_allele.exposure	effect_allele.outcome	other_allele.outcome	beta.exposure	beta.outcome	eaf.exposure	eaf.outcome	se.outcome	pval.outcome	exposure	outcome	se.exposure	pval.exposure
rs1016287	T	C	T	C	0.0254	0.0112	0.675	0.2572	0.0229	0.62499997503987	Pre-pregnancy BMI	Gestational Diabetes Mellitus	0.0044	5.87003e-09
rs10182181	G	A	G	A	0.0366	0.0456	0.5	0.4186	0.0204	0.0254900096567867	Pre-pregnancy BMI	Gestational Diabetes Mellitus	0.0039	3.90931e-21
rs10733682	A	G	A	G	0.0229	-0.0206	0.575	0.5329	0.0204	0.311099992042456	Pre-pregnancy BMI	Gestational Diabetes Mellitus	0.0041	1.66498e-08
rs10767664	A	T	A	T	0.0456	-0.0305	0.7833	0.8302	0.0268	0.254700032277104	Pre-pregnancy BMI	Gestational Diabetes Mellitus	0.0054	1.87715e-17
rs10938397	G	A	G	A	0.0404	0.0184	0.4333	0.4743	0.0201	0.360999832169349	Pre-pregnancy BMI	Gestational Diabetes Mellitus	0.0041	2.98401e-23
rs10968576	G	A	G	A	0.0289	0.0106	0.2917	0.3734	0.0207	0.609699726211493	Pre-pregnancy BMI	Gestational Diabetes Mellitus	0.0043	1.0349e-11
rs11165643	T	C	T	C	0.023	7e-04	0.575	0.599	0.0206	0.971200058744187	Pre-pregnancy BMI	Gestational Diabetes Mellitus	0.004	5.75705e-09
rs12401738	A	G	A	G	0.0256	0.0161	0.425	0.3349	0.0213	0.449500314572086	Pre-pregnancy BMI	Gestational Diabetes Mellitus	0.0041	6.09004e-10
rs12446632	G	A	G	A	0.0432	-0.0183	0.1333	0.8751	0.0304	0.548000557112049	Pre-pregnancy BMI	Gestational Diabetes Mellitus	0.0058	1.44611e-13
rs12885454	C	A	C	A	0.0228	0.0158	0.3667	0.6463	0.0211	0.452200460213717	Pre-pregnancy BMI	Gestational Diabetes Mellitus	0.0041	2.89101e-08
rs13021737	G	A	G	A	0.0686	0.0765	0.875	0.8375	0.0274	0.00530798882664104	Pre-pregnancy BMI	Gestational Diabetes Mellitus	0.0052	6.98715e-40
rs13078960	G	T	G	T	0.0336	-0.0057	0.1833	0.1728	0.0264	0.828999941684325	Pre-pregnancy BMI	Gestational Diabetes Mellitus	0.005	1.40994e-11
rs1516725	C	T	C	T	0.0466	0.0112	0.9083	0.8996	0.0335	0.73780059308348	Pre-pregnancy BMI	Gestational Diabetes Mellitus	0.0059	1.91382e-15
rs1558902	A	T	A	T	0.0791	0.0739	0.45	0.4177	0.0204	0.000290201731938023	Pre-pregnancy BMI	Gestational Diabetes Mellitus	0.0041	4.03181e-84
rs16851483	T	G	T	G	0.0524	0.0338	0.0917	0.04872	0.0467	0.469000169853964	Pre-pregnancy BMI	Gestational Diabetes Mellitus	0.0096	4.80596e-08
rs16951275	T	C	T	C	0.0302	-0.0115	0.225	0.8393	0.0273	0.673599878257877	Pre-pregnancy BMI	Gestational Diabetes Mellitus	0.0048	2.96101e-10
rs17024393	C	T	C	T	0.0713	0.0583	0.04167	0.05562	0.0437	0.181800050699556	Pre-pregnancy BMI	Gestational Diabetes Mellitus	0.0114	3.53102e-10
rs17405819	T	C	T	C	0.0243	0.0326	0.3667	0.7161	0.0223	0.144100006365967	Pre-pregnancy BMI	Gestational Diabetes Mellitus	0.0043	1.45301e-08
rs1808579	C	T	C	T	0.0224	0.0674	0.475	0.5075	0.0201	0.000812605953818404	Pre-pregnancy BMI	Gestational Diabetes Mellitus	0.0039	1.232e-08
rs1928295	T	C	T	C	0.0258	-0.0111	0.425	0.486	0.0201	0.579200595892931	Pre-pregnancy BMI	Gestational Diabetes Mellitus	0.0039	3.42137e-11
rs205262	G	A	G	A	0.0268	-0.0195	0.2667	0.2821	0.0225	0.384199681059943	Pre-pregnancy BMI	Gestational Diabetes Mellitus	0.0045	2.04099e-09
rs2112347	T	G	T	G	0.0298	0.0134	0.375	0.5858	0.0204	0.510900114483695	Pre-pregnancy BMI	Gestational Diabetes Mellitus	0.0041	3.14775e-13
rs2207139	G	A	G	A	0.0465	0.065	0.1	0.2024	0.025	0.00920301224766453	Pre-pregnancy BMI	Gestational Diabetes Mellitus	0.0052	2.40381e-19
rs3101336	C	T	C	T	0.0334	0.0557	0.6491	0.6462	0.021	0.00810998404850637	Pre-pregnancy BMI	Gestational Diabetes Mellitus	0.004	8.90841e-17
rs3810291	A	G	A	G	0.0295	-0.008	0.625	0.6321	0.0209	0.701899608217253	Pre-pregnancy BMI	Gestational Diabetes Mellitus	0.0047	2.60298e-10
rs3817334	T	C	T	C	0.0265	0.0101	0.45	0.3969	0.021	0.630499868020009	Pre-pregnancy BMI	Gestational Diabetes Mellitus	0.004	2.46888e-11
rs4256980	G	C	G	C	0.0232	0.0354	0.725	0.6483	0.0211	0.093389919274143	Pre-pregnancy BMI	Gestational Diabetes Mellitus	0.0041	1.652e-08
rs543874	G	A	G	A	0.0603	0.0319	0.2667	0.1775	0.0262	0.224200202232323	Pre-pregnancy BMI	Gestational Diabetes Mellitus	0.005	9.61391e-34
rs6091540	C	T	C	T	0.0297	0.0809	0.275	0.7705	0.024	0.000743806552637394	Pre-pregnancy BMI	Gestational Diabetes Mellitus	0.0044	2.15377e-11
rs6465468	T	G	T	G	0.0245	0.0214	0.325	0.2455	0.0235	0.362100396191666	Pre-pregnancy BMI	Gestational Diabetes Mellitus	0.0045	4.98001e-08
rs6567160	C	T	C	T	0.0563	0.0624	0.2833	0.1843	0.0259	0.0157601374204899	Pre-pregnancy BMI	Gestational Diabetes Mellitus	0.0046	5.08276e-34
rs657452	A	G	A	G	0.0233	-0.0307	0.5833	0.4263	0.0203	0.129800091914917	Pre-pregnancy BMI	Gestational Diabetes Mellitus	0.0041	1.69899e-08
rs7138803	A	G	A	G	0.0348	0.0207	0.4417	0.3845	0.0208	0.319100143869811	Pre-pregnancy BMI	Gestational Diabetes Mellitus	0.0041	1.80302e-17
rs7141420	T	C	T	C	0.0262	-0.0082	0.6167	0.5888	0.0204	0.686600317630152	Pre-pregnancy BMI	Gestational Diabetes Mellitus	0.0039	1.45011e-11
rs7239883	G	A	G	A	0.0231	0.0145	0.6833	0.4318	0.0203	0.476099801056656	Pre-pregnancy BMI	Gestational Diabetes Mellitus	0.0041	1.51098e-08

## Sheet: Supplementary Table S5
Supplementary Table S5: Details of the genetic variants used in the Mendelian randomization analysis of Pre-pregnancy BMI and Preterm Birth
SNP	effect_allele.exposure	other_allele.exposure	effect_allele.outcome	other_allele.outcome	beta.exposure	beta.outcome	eaf.exposure	se.outcome	pval.outcome	exposure	outcome	se.exposure	pval.exposure
rs1016287	T	C	T	C	0.0254	0.01	0.675	0.0255	0.6965	Pre-pregnancy BMI	Preterm Birth	0.0044	5.87003e-09
rs10182181	G	A	G	A	0.0366	-0.0364	0.5	0.0231	0.1152	Pre-pregnancy BMI	Preterm Birth	0.0039	3.90931e-21
rs10733682	A	G	A	G	0.0229	0.0706	0.575	0.0322	0.02855	Pre-pregnancy BMI	Preterm Birth	0.0041	1.66498e-08
rs10767664	A	T	A	T	0.0456	-0.0128	0.7833	0.028	0.6461	Pre-pregnancy BMI	Preterm Birth	0.0054	1.87715e-17
rs10938397	G	A	G	A	0.0404	0.0125	0.4333	0.0234	0.5919	Pre-pregnancy BMI	Preterm Birth	0.0041	2.98401e-23
rs10968576	G	A	G	A	0.0289	0.0207	0.2917	0.0248	0.4041	Pre-pregnancy BMI	Preterm Birth	0.0043	1.0349e-11
rs11165643	T	C	T	C	0.023	-0.0445	0.575	0.0233	0.05608	Pre-pregnancy BMI	Preterm Birth	0.004	5.75705e-09
rs12401738	A	G	A	G	0.0256	-0.0794	0.425	0.024	0.0009569	Pre-pregnancy BMI	Preterm Birth	0.0041	6.09004e-10
rs12446632	G	A	G	A	0.0432	-0.0527	0.1333	0.0341	0.1217	Pre-pregnancy BMI	Preterm Birth	0.0058	1.44611e-13
rs12885454	C	A	C	A	0.0228	0.0122	0.3667	0.024	0.6115	Pre-pregnancy BMI	Preterm Birth	0.0041	2.89101e-08
rs13021737	G	A	G	A	0.0686	0.0634	0.875	0.0314	0.04336	Pre-pregnancy BMI	Preterm Birth	0.0052	6.98715e-40
rs13078960	G	T	G	T	0.0336	-0.0492	0.1833	0.0292	0.09178	Pre-pregnancy BMI	Preterm Birth	0.005	1.40994e-11
rs1516725	C	T	C	T	0.0466	0.0043	0.9083	0.0364	0.9064	Pre-pregnancy BMI	Preterm Birth	0.0059	1.91382e-15
rs1558902	A	T	A	T	0.0791	-0.003	0.45	0.0233	0.8986	Pre-pregnancy BMI	Preterm Birth	0.0041	4.03181e-84
rs16851483	T	G	T	G	0.0524	-0.0152	0.0917	0.0496	0.7592	Pre-pregnancy BMI	Preterm Birth	0.0096	4.80596e-08
rs16951275	T	C	T	C	0.0302	0.0321	0.225	0.0276	0.2447	Pre-pregnancy BMI	Preterm Birth	0.0048	2.96101e-10
rs17024393	C	T	C	T	0.0713	0.0617	0.04167	0.0623	0.3221	Pre-pregnancy BMI	Preterm Birth	0.0114	3.53102e-10
rs17405819	T	C	T	C	0.0243	-0.0167	0.3667	0.0252	0.5083	Pre-pregnancy BMI	Preterm Birth	0.0043	1.45301e-08
rs1808579	C	T	C	T	0.0224	-0.011	0.475	0.0231	0.633	Pre-pregnancy BMI	Preterm Birth	0.0039	1.232e-08
rs1928295	T	C	T	C	0.0258	-0.0153	0.425	0.0231	0.5092	Pre-pregnancy BMI	Preterm Birth	0.0039	3.42137e-11
rs205262	G	A	G	A	0.0268	0.0079	0.2667	0.0255	0.7582	Pre-pregnancy BMI	Preterm Birth	0.0045	2.04099e-09
rs2112347	T	G	T	G	0.0298	0.0219	0.375	0.0239	0.3599	Pre-pregnancy BMI	Preterm Birth	0.0041	3.14775e-13
rs2207139	G	A	G	A	0.0465	-0.0038	0.1	0.0312	0.9029	Pre-pregnancy BMI	Preterm Birth	0.0052	2.40381e-19
rs3101336	C	T	C	T	0.0334	-0.0331	0.6491	0.0235	0.159	Pre-pregnancy BMI	Preterm Birth	0.004	8.90841e-17
rs3810291	A	G	A	G	0.0295	-0.0645	0.625	0.0249	0.00972	Pre-pregnancy BMI	Preterm Birth	0.0047	2.60298e-10
rs3817334	T	C	T	C	0.0265	-0.0041	0.45	0.0235	0.8602	Pre-pregnancy BMI	Preterm Birth	0.004	2.46888e-11
rs4256980	G	C	G	C	0.0232	0.0609	0.725	0.0242	0.01202	Pre-pregnancy BMI	Preterm Birth	0.0041	1.652e-08
rs543874	G	A	G	A	0.0603	-0.0284	0.2667	0.0282	0.313	Pre-pregnancy BMI	Preterm Birth	0.005	9.61391e-34
rs6091540	C	T	C	T	0.0297	0.0424	0.275	0.026	0.1035	Pre-pregnancy BMI	Preterm Birth	0.0044	2.15377e-11
rs6465468	T	G	T	G	0.0245	-0.0098	0.325	0.036	0.7846	Pre-pregnancy BMI	Preterm Birth	0.0045	4.98001e-08
rs6567160	C	T	C	T	0.0563	-0.0458	0.2833	0.0272	0.09262	Pre-pregnancy BMI	Preterm Birth	0.0046	5.08276e-34
rs657452	A	G	A	G	0.0233	-0.037	0.5833	0.0239	0.1213	Pre-pregnancy BMI	Preterm Birth	0.0041	1.69899e-08
rs7138803	A	G	A	G	0.0348	0.0144	0.4417	0.0236	0.5416	Pre-pregnancy BMI	Preterm Birth	0.0041	1.80302e-17
rs7141420	T	C	T	C	0.0262	-0.0142	0.6167	0.0242	0.5565	Pre-pregnancy BMI	Preterm Birth	0.0039	1.45011e-11
rs7239883	G	A	G	A	0.0231	0.0033	0.6833	0.0237	0.8877	Pre-pregnancy BMI	Preterm Birth	0.0041	1.51098e-08

## Sheet: Supplementary Table S6
Supplementary Table S6: Details of the genetic variants used in the Mendelian randomization analysis of Pre-pregnancy BMI and Birthweight
SNP	effect_allele.exposure	other_allele.exposure	effect_allele.outcome	other_allele.outcome	beta.exposure	beta.outcome	eaf.exposure	eaf.outcome	se.outcome	pval.outcome	exposure	outcome	se.exposure	pval.exposure
rs1016287	T	C	T	C	0.0254	0.003218	0.675	0.293216	0.002696	0.232623	Pre-pregnancy BMI	Birthweight	0.0044	5.87003e-09
rs10182181	G	A	G	A	0.0366	0.001491	0.5	0.489085	0.002469	0.54592	Pre-pregnancy BMI	Birthweight	0.0039	3.90931e-21
rs10733682	A	G	A	G	0.0229	-0.005259	0.575	0.473608	0.002499	0.035388	Pre-pregnancy BMI	Birthweight	0.0041	1.66498e-08
rs10767664	A	T	A	T	0.0456	0.008019	0.7833	0.792082	0.003036	0.008284	Pre-pregnancy BMI	Birthweight	0.0054	1.87715e-17
rs10938397	G	A	G	A	0.0404	0.003372	0.4333	0.424619	0.002496	0.176633	Pre-pregnancy BMI	Birthweight	0.0041	2.98401e-23
rs10968576	G	A	G	A	0.0289	-0.002704	0.2917	0.31126	0.002651	0.307841	Pre-pregnancy BMI	Birthweight	0.0043	1.0349e-11
rs11165643	T	C	T	C	0.023	0.000767	0.575	0.579178	0.002507	0.759613	Pre-pregnancy BMI	Birthweight	0.004	5.75705e-09
rs12401738	A	G	A	G	0.0256	0.00613	0.425	0.356975	0.002583	0.01766	Pre-pregnancy BMI	Birthweight	0.0041	6.09004e-10
rs12446632	G	A	G	A	0.0432	-0.000938	0.1333	0.863757	0.003585	0.793668	Pre-pregnancy BMI	Birthweight	0.0058	1.44611e-13
rs12885454	C	A	C	A	0.0228	0.004721	0.3667	0.650999	0.002581	0.067381	Pre-pregnancy BMI	Birthweight	0.0041	2.89101e-08
rs13021737	G	A	G	A	0.0686	0.001987	0.875	0.831445	0.003276	0.544178	Pre-pregnancy BMI	Birthweight	0.0052	6.98715e-40
rs13078960	G	T	G	T	0.0336	-0.000178	0.1833	0.193233	0.003117	0.954348	Pre-pregnancy BMI	Birthweight	0.005	1.40994e-11
rs1516725	C	T	C	T	0.0466	0.012157	0.9083	0.86633	0.00361	0.000763	Pre-pregnancy BMI	Birthweight	0.0059	1.91382e-15
rs1558902	A	T	A	T	0.0791	0.003954	0.45	0.394113	0.002529	0.117897	Pre-pregnancy BMI	Birthweight	0.0041	4.03181e-84
rs16851483	T	G	T	G	0.0524	0.009462	0.0917	0.0655	0.005006	0.058749	Pre-pregnancy BMI	Birthweight	0.0096	4.80596e-08
rs16951275	T	C	T	C	0.0302	0.004955	0.225	0.764618	0.002903	0.087787	Pre-pregnancy BMI	Birthweight	0.0048	2.96101e-10
rs17024393	C	T	C	T	0.0713	0.007219	0.04167	0.029271	0.007356	0.326406	Pre-pregnancy BMI	Birthweight	0.0114	3.53102e-10
rs17405819	T	C	T	C	0.0243	0.005328	0.3667	0.709809	0.002711	0.049372	Pre-pregnancy BMI	Birthweight	0.0043	1.45301e-08
rs1808579	C	T	C	T	0.0224	-0.000432	0.475	0.522531	0.002457	0.860371	Pre-pregnancy BMI	Birthweight	0.0039	1.232e-08
rs1928295	T	C	T	C	0.0258	0.000659	0.425	0.56473	0.002467	0.789293	Pre-pregnancy BMI	Birthweight	0.0039	3.42137e-11
rs205262	G	A	G	A	0.0268	-0.00413	0.2667	0.278729	0.002758	0.134217	Pre-pregnancy BMI	Birthweight	0.0045	2.04099e-09
rs2112347	T	G	T	G	0.0298	0.002318	0.375	0.629925	0.002546	0.362656	Pre-pregnancy BMI	Birthweight	0.0041	3.14775e-13
rs2207139	G	A	G	A	0.0465	0.001447	0.1	0.167381	0.003277	0.658801	Pre-pregnancy BMI	Birthweight	0.0052	2.40381e-19
rs3101336	C	T	C	T	0.0334	-0.000364	0.6491	0.608835	0.002514	0.884742	Pre-pregnancy BMI	Birthweight	0.004	8.90841e-17
rs3810291	A	G	A	G	0.0295	0.00515	0.625	0.64996	0.002644	0.051502	Pre-pregnancy BMI	Birthweight	0.0047	2.60298e-10
rs3817334	T	C	T	C	0.0265	-0.007993	0.45	0.397267	0.002502	0.001409	Pre-pregnancy BMI	Birthweight	0.004	2.46888e-11
rs4256980	G	C	G	C	0.0232	0.005539	0.725	0.635969	0.002563	0.03067	Pre-pregnancy BMI	Birthweight	0.0041	1.652e-08
rs543874	G	A	G	A	0.0603	-0.002347	0.2667	0.201639	0.003048	0.441232	Pre-pregnancy BMI	Birthweight	0.005	9.61391e-34
rs6091540	C	T	C	T	0.0297	0.009365	0.275	0.713337	0.002712	0.000556	Pre-pregnancy BMI	Birthweight	0.0044	2.15377e-11
rs6465468	T	G	T	G	0.0245	-8e-05	0.325	0.292902	0.002722	0.976443	Pre-pregnancy BMI	Birthweight	0.0045	4.98001e-08
rs6567160	C	T	C	T	0.0563	0.000379	0.2833	0.231088	0.002909	0.896217	Pre-pregnancy BMI	Birthweight	0.0046	5.08276e-34
rs657452	A	G	A	G	0.0233	0.003396	0.5833	0.404629	0.002519	0.177678	Pre-pregnancy BMI	Birthweight	0.0041	1.69899e-08
rs7138803	A	G	A	G	0.0348	0.003147	0.4417	0.360081	0.002556	0.218313	Pre-pregnancy BMI	Birthweight	0.0041	1.80302e-17
rs7141420	T	C	T	C	0.0262	-0.001047	0.6167	0.522379	0.002467	0.671252	Pre-pregnancy BMI	Birthweight	0.0039	1.45011e-11
rs7239883	G	A	G	A	0.0231	0.000957	0.6833	0.385281	0.002521	0.704187	Pre-pregnancy BMI	Birthweight	0.0041	1.51098e-08
